# Supplementary material
Source: publisher figshare collection journal article supplement (https://acs.figshare.com/ndownloader/files/4574638)

## *Supporting Information*

# Total Synthesis of ( $\pm$ )-Rhazinal Using Novel Palladium-Catalyzed Cyclizations

Alfred L. Bowie Jr., and Dirk Trauner\*

Department of Chemistry, University of California; Berkeley, CA 94720.

trauner@berkeley.edu

### Table of Contents

|                                    |   |
|------------------------------------|---|
| General Information                | 1 |
| General Oxidative Procedure        | 2 |
| Information for Prepared Compounds | 3 |
| Spectra of Prepared Compounds      | 8 |

**General Information.** Tetrahydrofuran (THF) was distilled from Na/benzophenone. Triethylamine ( $\text{Et}_3\text{N}$ ) was distilled from calcium hydride. Dichloromethane ( $\text{CH}_2\text{Cl}_2$ ) and ether ( $\text{Et}_2\text{O}$ ) were dried by passing through a column of activated alumina prior to use. n-Butyllithium (n-BuLi) and t-butyllithium (t-BuLi) were titrated periodically with diphenylacetic acid. All other starting materials and solvents are commercially available and were used without further purification. Chromatography was carried out with silica gel. All mixed solvent systems were reported as v/v solutions. Extracts were dried over  $\text{MgSO}_4$ , and solvents were removed with a rotary evaporator under reduced pressure.  $^1\text{H}$  and  $^{13}\text{C}$  NMR spectra were recorded in  $\text{CDCl}_3$  (7.27 ppm, 77.23 ppm) on a 400 MHz spectrometer.

### General Procedure for Oxidative Heck Reaction of **9** (Table 1, entry 7)

To pyrrole **9** (60 mg, 0.338 mmol) was added first Dioxane:AcOH:DMSO (9:3:1, 0.1M), then Pd(OAc)<sub>2</sub> (7.6 mg, 0.034 mmol), then t-BuOOH (1.0 eq, 0.338 mmol). The solution was heated to 45 °C for 3 h, cooled to room temperature, filtered over a plug of silica gel (30% EtOAc in hexanes) and concentrated under vacuum. The product was purified by flash chromatography (10% EtOAc in hexanes) to afford 39.6 mg (62%) of 8-Ethyl-8-vinyl-5,6,7,8-tetrahydro-indolizine **10** as a pale yellow oil.

**(E)-ethyl 4-ethylhex-4-enoate 7.** To the neat known allylic alcohol **6** (1.00 g, 9.88 mmol) was added ethyl orthoacetate (12.7 mL, 69.2 mmol) and propionic acid (44 mg, 0.6 mmol). The solution was heated at 120 °C for 1 h under conditions for distillative removal of ethanol. The product was purified via flash chromatography (10% EtOAc in hexanes) to afford 1.45 g (94%) of the desired ester **7** as a colorless oil: IR (film): 2961, 1726, 1453, 1265 cm<sup>-1</sup>; <sup>1</sup>H NMR: δ 5.14 (q, *J* = 7.0 Hz, 1H), 4.08 (m, 2H), 2.34 (m, 2H), 2.26 (m, 2H), 1.98 (m, 2H), 1.54 (d, *J* = 7.0 Hz, 3H), 1.20 (m, 3H), 0.96 (m, 3H); <sup>13</sup>C NMR: δ 173.4, 139.9, 118.5, 60.2, 32.9, 31.5, 22.7, 14.1, 12.8, 12.6; HRMS (EI+): *m/z* (M+) calcd for C<sub>10</sub>H<sub>18</sub>O<sub>2</sub> 170.1308; found 170.1307.

**(E)-ethyl 4-ethylhex-4-en-1-ol .** A solution of ester **7** (700 mg, 4.5 mmol) in Et<sub>2</sub>O was added over 5 min. to a mixture of lithium aluminum hydride (170 mg, 4.5 mmol) in Et<sub>2</sub>O (15mL) at 0 °C. After addition of the ester, the solution was allowed to warm to room temperature and stirred for 2 h. The resulting mixture was then cooled back down to 0°C and sodium sulfate decahydrate was added in excess until there was no visible sign of bubbling. The reaction was then filtered through a plug of Celite and concentrated under vacuum to yield a yellow oil. The product was purified by column chromatography (35% EtOAc in hexanes) to afford 460 mg (80%) of (*E*)-ethyl 4-ethylhex-4-en-1-ol as a colorless oil: IR (film): 3415, 2966, 1457, 1265 cm<sup>-1</sup>; <sup>1</sup>H NMR: δ 5.20 (q, *J* = 7.0 Hz, 1H), 3.62 (m, 2H), 2.09 (m, 4H), 1.67 (m, 2H), 1.58 (d, *J* = 7.0 Hz, 3H), 1.57 (br s, 1H), 0.97 (d, *J* = 7.0 Hz, 3H); <sup>13</sup>C NMR: δ 141.3, 118.2, 62.9, 32.8, 30.9, 22.6, 12.9, 12.7; HRMS (EI+): *m/z* (M+) calcd for C<sub>8</sub>H<sub>16</sub>O 128.1201; found 128.1203.

**(E)-4-ethylhex-4-enyl 4-methylbenzenesulfonate 8.** To a solution of (*E*)-ethyl 4-ethylhex-4-en-1-ol (400 mg, 3.1 mmol) in CH<sub>2</sub>Cl<sub>2</sub> (5 mL) at 0 °C was added *p*-toluene sulfonyl chloride (0.91 g, 4.7 mmol) was added, followed by pyridine (0.54 mL, 6.7 mmol). The reaction was allowed to warm to room temperature and stirred overnight. The reaction was dilute with ether (20 mL) and washed with H<sub>2</sub>O (20 mL), 1M HCl (20 mL), sat'd soln. NaHCO<sub>3</sub> (20 mL), and brine. The organic extracts were combined and dried, filtered and concentrated under vacuum to afford a yellow oil. The product was purified by column chromatography (15% EtOAc in hexanes) to afford 808 mg (92%) of the desired tosylate **8** as a colorless oil: IR (film): 1290, 715 cm<sup>-1</sup>; <sup>1</sup>H NMR: δ 7.80 (d, *J* = 8.0 Hz, 2H), 7.35 (d, *J* = 8.0 Hz, 2H), 5.04 (q, *J* = 7.0 Hz, 1H), 4.01 (m, 2H), 2.46 (s, 3H), 1.98 (m, 4H), 1.74 (m, 2H), 1.53 (d, *J* = 7.0 Hz, 3H), 0.97 (m, 3H); <sup>13</sup>C NMR: δ 144.6, 139.6, 133.1, 129.8, 127.9, 119.0, 70.4, 32.0, 27.3, 22.4, 21.6, 12.9, 12.7; HRMS (EI<sup>+</sup>): *m/z* (M+H<sup>+</sup>) calcd for C<sub>15</sub>H<sub>22</sub>O<sub>3</sub>S 283.1368; found 283.1373.

**1-((E)-4-ethylhex-4-enyl)-1H-pyrrole 9.** Pyrrole (568 mg, 8.4 mmol) was added to a stirred suspension of KH (1.10 g, 8.4 mmol) in dry *N,N*-dimethylformamide (DMF, 42 mL) and the resulting solution was stirred at room temperature for 5 min. Then a solution of tosylate **8** (1.20 g, 4.2mmol) in DMF (10mL) was added and the flask containing the tosylate was rinsed with an additional 2 mL DMF. The resulting mixture was stirred at room temperature for 2 h, then quenched with H<sub>2</sub>O (20mL) and partitioned between ethyl acetate (100mL) and 1 M HCl (20mL). The separated aqueous phase was extracted with ethyl acetate (2x 40mL) and then combined organic phases washed with H<sub>2</sub>O (3x40mL) and brine (50 mL), dried, filtered, and concentrated under vacuum to yield a brown oil. The product was purified by column chromatography (10% EtOAc in hexanes) to afford 476 mg (64%) of **9** as a colorless oil: IR (film): 1226, 715 cm<sup>-1</sup>; <sup>1</sup>H NMR: δ 6.65 (m, 2H), 6.13 (m, 2H), 5.20 (q, *J* = 10.0 Hz, 1H), 3.84 (m, 2H), 2.05 (m, 2H), 1.98 (m, 2H), 1.87 (m, 2H), 1.59 (d, *J* = 10.0 Hz, 3H), 0.97 (m, 3H); <sup>13</sup>C NMR: δ 141.2, 120.4, 118.7, 107.7, 49.1, 33.5, 29.7, 22.6, 13.0, 12.7; HRMS (EI<sup>+</sup>): *m/z* (M<sup>+</sup>) calcd for C<sub>12</sub>H<sub>19</sub>N 177.1517; found 177.1517.

**8-Ethyl-8-vinyl-5,6,7,8-tetrahydro-indolizine 10.** IR (film): 1276, 715  $\text{cm}^{-1}$ ;  $^1\text{H}$  NMR:  $\delta$  6.52 (d,  $J$  = 2.0 Hz, 1H), 6.14 (t,  $J$  = 3.0 Hz, 1H), 5.93 (d,  $J$  = 2.0 Hz, 1H), 5.82 (q,  $J$  = 7.0 Hz, 1H), 5.05 (d,  $J$  = 12.0 Hz, 1H), 4.81, (d,  $J$  = 18.5 Hz, 1H), 4.14 (q,  $J$  = 7.5 Hz, 2H), 3.86 (t,  $J$  = 7.0 Hz, 2H), 3.93 (m, 1H), 3.84 (m, 1H), 2.36 (m, 2H), 2.05 (m, 2H), 1.88 (m, 2H), 1.79 (m, 1H), 1.70 (m, 1H), 1.23 (t,  $J$  = 7.0 Hz, 3H);  $^{13}\text{C}$  NMR:  $\delta$  173.9, 145.2, 132.5, 118.9, 113.8, 107.4, 105.1, 60.3, 45.3, 41.8, 35.6, 31.0, 30.0, 19.8, 14.2; HRMS (EI+):  $m/z$  ( $\text{M}^+$ ) calcd for  $\text{C}_{15}\text{H}_{23}\text{NO}_2$  249.1728; found 249.1720.

**5-(*tert*-Butyl-diphenyl-silanyloxy)-2-methylene-pentanal 12.** To a mixture of an aqueous formaldehyde solution (37% formaldehyde in water, 15.5 mmol, 1.0 eq) and aldehyde **11** (15.5 mmol) in *i*-PrOH (1.55 mL) was added propionic acid (1.55 mmol, 10 mol %) followed by pyrrolidine (1.55 mmol, 10 mol%). The reaction was stirred at 45 °C for 25 h. A sat'd solution of  $\text{NaHCO}_3$  (45 mL) was added and the mixture was extracted with  $\text{CH}_2\text{Cl}_2$  (3 x 50 mL). The combined organic extracts were washed with brine, dried, and concentrated under vacuum. The product was purified by column chromatography (10% EtOAc in hexanes) to afford 5.35 g (98%) of **12** as a colorless oil: IR (film): 3070, 1960, 1471  $\text{cm}^{-1}$ ;  $^1\text{H}$  NMR:  $\delta$  9.51 (s, 1H), 7.69 (m, 4H), 7.45 (m, 6H), 6.22 (s, 1H), 5.98 (s, 1H), 3.68 (m, 2H), 2.39 (m, 2H), 1.73 (m, 2H), 1.09 (s, 9H);  $^{13}\text{C}$  NMR:  $\delta$  194.6, 149.8, 135.5, 134.2, 133.8, 129.6, 127.7, 63.6, 30.4, 26.8, 24.3, 19.2; HRMS (EI+):  $m/z$  ( $\text{M}+\text{Li}^+$ ) calcd for  $\text{C}_{22}\text{H}_{28}\text{O}_2\text{Si}$  359.2019; found 359.2021.

**6-(*tert*-Butyl-diphenyl-silanyloxy)-3-methylene-hexan-2-ol 13.** To a cooled (0 °C) solution of acrolein **12** (4.81 g, 13.36 mmol) in  $\text{Et}_2\text{O}$  (50 mL), was added MeLi (0.8 M in  $\text{Et}_2\text{O}$ , 19 mL, 15.2 mmol) over 2 h via cannula. The flask containing the MeLi was rinsed with an additional 5 mL  $\text{Et}_2\text{O}$ . After addition of MeLi, the solution was allowed to warm to room temperature over 6 h. The resulting solution was then cooled back down to 0 °C and a saturated solution of  $\text{NH}_4\text{Cl}$  was slowly added. The solution was allowed to warm to room temperature and extracted with  $\text{Et}_2\text{O}$  (3 x 100 mL). The combined organic extracts were washed with brine (50 mL), dried, filtered, and concentrated under vacuum to yield a yellow

oil. The product was purified by column chromatography (20% EtOAc in hexanes) to afford 2.52 g (50%) of **13** as a colorless oil: IR (film): 3376, 2933  $\text{cm}^{-1}$ ;  $^1\text{H}$  NMR:  $\delta$  7.59 (m, 4H), 7.34 (m, 6H), 4.95 (s, 1H), 4.70 (s, 1H), 4.15 (m, 1H), 3.62 (m, 2H), 2.13 (m, 1H), 2.06 (m, 1H), 1.67 (m, 2H), 1.49 (br s, 1H), 1.2 (d,  $J = 2.0$  Hz, 3H), 0.97 (m, 1H);  $^{13}\text{C}$  NMR:  $\delta$  152.9, 135.5, 133.9, 129.5, 127.6, 108.3, 71.0, 63.5, 31.0, 27.9, 26.8, 22.2, 19.2; HRMS (EI+):  $m/z$  ( $\text{M}+\text{H}^+$ ) calcd for  $\text{C}_{23}\text{H}_{32}\text{O}_2\text{Si}$  369.2250; found 369.2251.

**7-(*tert*-Butyl-diphenyl-silanyloxy)-4-eth-(E)-ylidene-heptanoic acid ethyl ester 14.** To a solution of allylic alcohol **13** (5.09 g, 13.8 mmol) neat was added ethyl orthoacetate (17.8 mL, 69.2 mmol) and propionic acid (61 mg, 0.8 mmol). The solution was heated at 120  $^\circ\text{C}$  for 1 h under conditions for distillative removal of ethanol and excess ethyl orthoacetate. The product was subsequently purified by column chromatography (15% EtOAc in hexanes) to afford 5.70 g (94%) of **14** as a colorless oil: IR (film): 3048, 1654  $\text{cm}^{-1}$ ;  $^1\text{H}$  NMR:  $\delta$  7.71 (m, 4H), 7.43 (m, 6H), 5.25 (q,  $J = 7.5$  Hz, 1H), 4.25 (m, 2H), 3.68 (m, 2H), 2.41 (m, 2H), 2.30 (m, 2H), 2.13 (m, 2H), 1.67 (m, 2H), 1.63 (d,  $J = 7.5$  Hz, 3H), 1.28 (m, 3H), 1.08 (s, 9H);  $^{13}\text{C}$  NMR:  $\delta$  173.5, 138.0, 135.5, 134.0, 129.5, 127.6, 119.5, 63.6, 60.2, 33.2, 31.9, 31.1, 26.8, 26.0, 22.2, 19.2, 14.2, 13.2; HRMS (EI+):  $m/z$  ( $\text{M}+\text{Li}^+$ ) calcd for  $\text{C}_{27}\text{H}_{38}\text{O}_3\text{Si}$  445.2742; found 445.2740.

**7-(*tert*-Butyl-diphenyl-silanyloxy)-4-eth-(Z)-ylidene-heptan-1-ol.** To a cooled (0  $^\circ\text{C}$ ) solution a solution of TBDMS-ether **14** (20.0 g, 45.6 mmol) in  $\text{Et}_2\text{O}$  (230 mL) was added TBAF (1.0 M in THF, 59.2 mmol). The reaction was allowed to warm to room temperature and after 1 h the reaction was quenched with a sat'd solution of brine and extracted with  $\text{Et}_2\text{O}$  (3 x 200 mL). The combined organic extracts were washed with brine (50 mL), dried, filtered, and concentrated under vacuum to yield a yellow oil. The product was subsequently purified by column chromatography (20% EtOAc in hexanes) to afford 7.30 g (80%) of 7-(*tert*-Butyl-diphenyl-silanyloxy)-4-eth-(Z)-ylidene-heptan-1-ol as a colorless oil: IR (film): 3508, 2940, 1728  $\text{cm}^{-1}$ ;  $^1\text{H}$  NMR:  $\delta$  5.20 (q,  $J = 6.8$  Hz, 1H), 4.07 (q,  $J = 6.8$  Hz, 2H), 3.56 (t,  $J = 6.8$  Hz, 2H), 2.90 (br s, 1H), 2.35 (m, 2H), 2.25 (m, 2H), 2.05 (m, 2H), 1.67 (m, 2H), 1.63 (d,  $J = 7.5$  Hz, 3H), 1.27 (t,  $J = 6.8$  Hz, 3H);  $^{13}\text{C}$  NMR:  $\delta$  173.6, 137.8,

119.7, 62.3, 60.1, 33.2, 31.7, 30.9, 26.5, 14.1, 13.1; HRMS (EI+):  $m/z$  (M+) calcd for  $C_{11}H_{21}O_3$  201.1491; found 201.1492.

**Toluene-4-sulfonic acid 7-(*tert*-butyl-diphenyl-silanyloxy)-4-eth-(E)-ylidene-heptyl ester 15.** Following the same procedure as described for compound **8**, reaction of 7-(*tert*-Butyl-diphenyl-silanyloxy)-4-eth-(Z)-ylidene-heptan-1-ol (1.06 g, 5.27 mmol) in  $CH_2Cl_2$  (17.6 mL) with p-toluene sulfonyl chloride (1.3 g, 6.9 mmol) and pyridine (0.9 mL, 11.3 mmol) afforded 1.40g (75%) of **15** as a colorless oil: IR (film): 3043, 1742, 1375  $cm^{-1}$ ;  $^1H$  NMR:  $\delta$  7.74 (d,  $J$  = 8.0 Hz, 2H), 7.28 (d,  $J$  = 8.0 Hz, 2H), 5.20 (q,  $J$  = 7.0 Hz, 1H), 4.06 (q,  $J$  = 6.5 Hz, 2H), 3.96 (t,  $J$  = 6.5 Hz, 2H), 2.38 (s, 1H), 2.28 (m, 2H), 2.18 (m, 2H), 2.01 (m, 2H), 1.66 (m, 2H), 1.48 (d,  $J$  = 7.0 Hz, 3H), 1.22 (t,  $J$  = 6.5 Hz, 3H);  $^{13}C$  NMR:  $\delta$  173.1, 144.7, 136.2, 133.0, 129.8, 127.8, 120.7, 70.1, 60.3, 33.0, 31.4, 27.1, 25.4, 21.5, 14.1 13.1; HRMS (EI+):  $m/z$  (M+) calcd for  $C_{18}H_{27}O_5$  Si 355.1579; found 355.1583.

**4-Eth-(Z)-ylidene-7-pyrrol-1-yl-heptanoic acid ethyl ester 5.** Following the same procedure as described for compound **9**, treatment of the potassium salt of pyrrole (568 mg, 8.4 mmol in dry *N,N*-dimethylformamide (DMF, 42 mL) with a solution of tosylate **15** (1.20 g, 4.2mmol) in DMF (10mL) afforded 476 mg (67%) of **5** as a colorless oil: IR (film): 3047, 1747  $cm^{-1}$ ;  $^1H$  NMR:  $\delta$  6.66 (m, 2H), 6.14 (m, 2H), 5.29 (q,  $J$  = 6.5 Hz, 1H), 4.14 (q,  $J$  = 7.5 Hz, 2H), 3.86 (t,  $J$  = 7.5 Hz, 2H), 2.39 (m, 2H), 2.31 (m, 2H), 2.10 (m, 2H), 1.88 (m, 2H), 1.57 (d,  $J$  = 7.5 Hz, 3H), 1.23 (t,  $J$  = 7.0 Hz, 3H);  $^{13}C$  NMR:  $\delta$  173.4, 137.0, 120.5, 120.31, 109.0, 60.3, 49.3, 33.1, 31.7, 29.8, 26.9, 14.2 13.2; HRMS (EI+):  $m/z$  (M+) calcd for  $C_{15}H_{23}NO_2$  249.1728; found 249.1720.

**3-(8-Vinyl-5,6,7,8-tetrahydro-indolizin-8-yl)-propionic acid ethyl ester 16.**

Following the same procedure as described for compound **10**. IR (film): 2948, 1767, 1712  $cm^{-1}$ ;  $^1H$  NMR:  $\delta$  6.52 (d,  $J$  = 2.0 Hz, 1H), 6.14 (t,  $J$  = 3.0 Hz, 1H), 5.93 (d,  $J$  = 2.0 Hz, 1H), 5.82 (q,  $J$  = 7.0 Hz, 1H), 5.05 (d,  $J$  = 12.0 Hz, 1H), 4.81, (d,  $J$  = 18.5 Hz, 1H), 4.14 (q,  $J$  = 7.5 Hz, 2H), 3.86 (t,  $J$  = 7.0 Hz, 2H), 3.93 (m, 1H), 3.84 (m, 1H), 2.36 (m, 2H), 2.05 (m, 2H), 1.88 (m, 2H), 1.79 (m, 1H), 1.70 (m, 1H), 1.23 (t,  $J$  = 7.0 Hz, 3H);

$^{13}\text{C}$  NMR:  $\delta$  173.9, 145.2, 132.5, 118.9, 113.8, 107.4, 105.1, 60.3, 45.3, 41.8, 35.6, 31.0, 30.0, 19.8, 14.2; HRMS (EI+):  $m/z$  ( $M^+$ ) calcd for  $\text{C}_{15}\text{H}_{23}\text{NO}_2$  249.1728; found 249.1720.

**3-(8-Ethyl-3-formyl-5,6,7,8-tetrahydro-indolizin-8-yl)-N-(phenyl)-**

**propionamide 3a.** Following a procedure analogous to the one described for compound **3b**, **21** and aniline afforded 150 mg (63%) of **3a** as a foamy solid. IR (film): 3300, 1721, 1656  $\text{cm}^{-1}$ ;  $^1\text{H}$  NMR:  $\delta$  9.42 (s, 1 H), 7.49 (d,  $J$  = 9.0 Hz, 2 H), 7.35 (d,  $J$  = 9.0 Hz, 2 H), 7.20 (br s, 1 H), 7.11 (t,  $J$  = 5 Hz, 1 H), 6.92 (d,  $J$  = 5.0 Hz, 1 H), 6.01 (t,  $J$  = 5 Hz, 1 H), 4.41 (m, 1H), 4.33 (m, 1H), 2.34 (m, 1 H), 2.27 (m, 1 H), 2.05 (m, 2 H), 1.97 (m, 2 H), 1.70 (m, 4 H), 0.86 (m, 3H);  $^{13}\text{C}$  NMR:  $\delta$  178.5, 170.8, 146.2, 137.8, 130.8, 129.0, 124.3, 124.2, 119.6, 107.5, 45.4, 38.2, 35.2, 33.7, 33.0, 28.8, 19.6, 8.6; HRMS (EI+):  $m/z$  ( $M^+$ ) calcd for  $\text{C}_{20}\text{H}_{25}\text{N}_2\text{O}_2$  325.1916; found 325.1909.

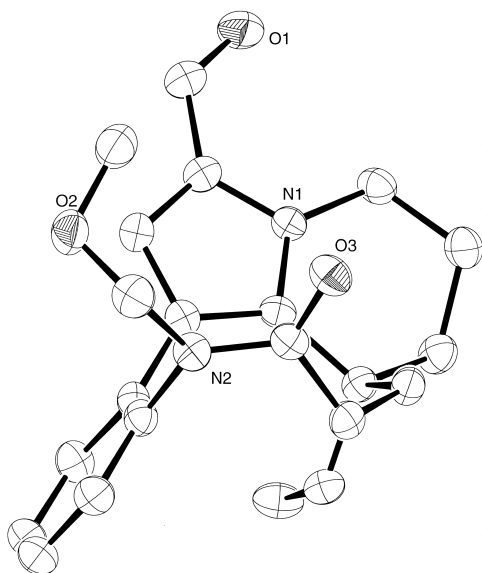

**Figure 2.** X-ray structure of *N*-MOM-rhazinal **26**. For clarity, the unnatural enantiomeric series is shown and hydrogen atoms are omitted.

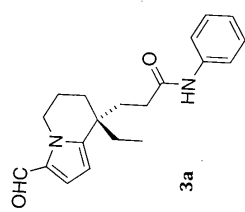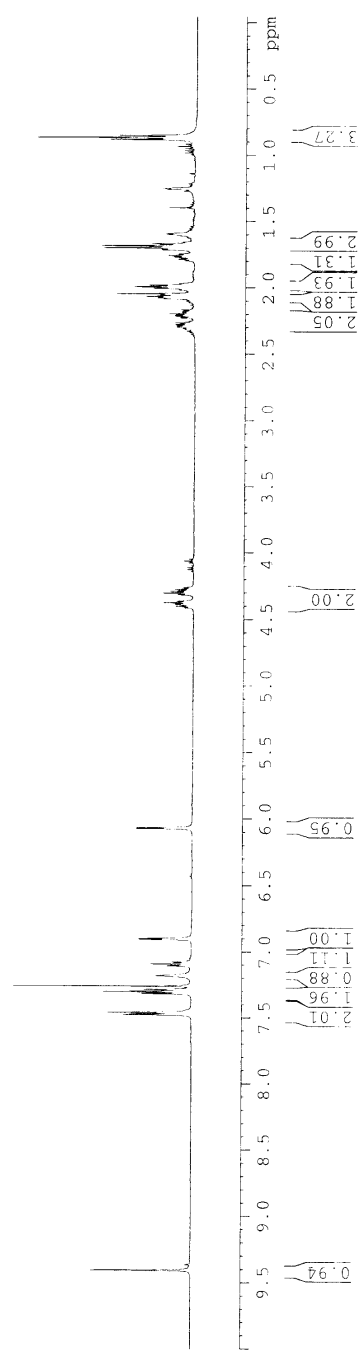



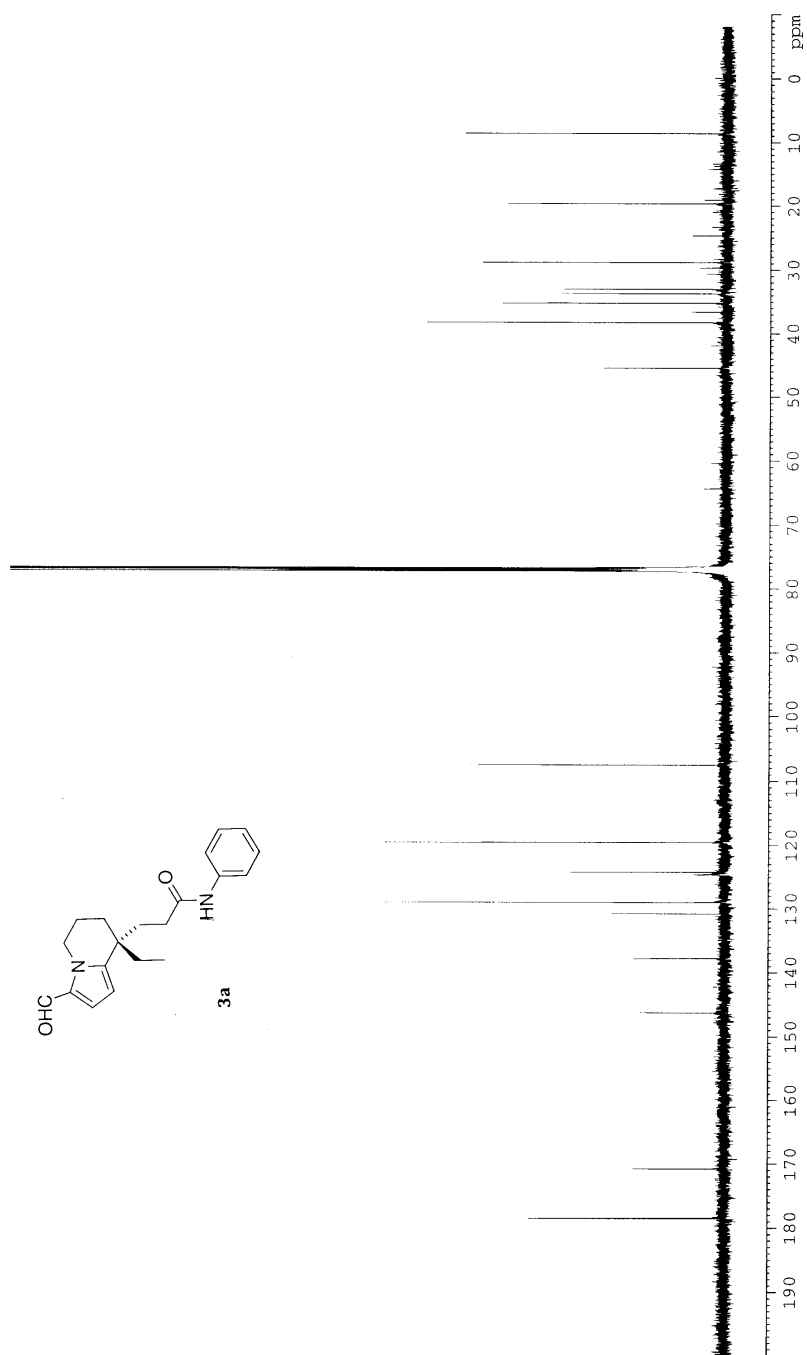

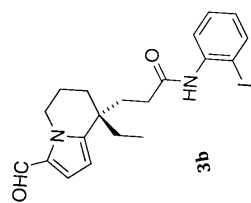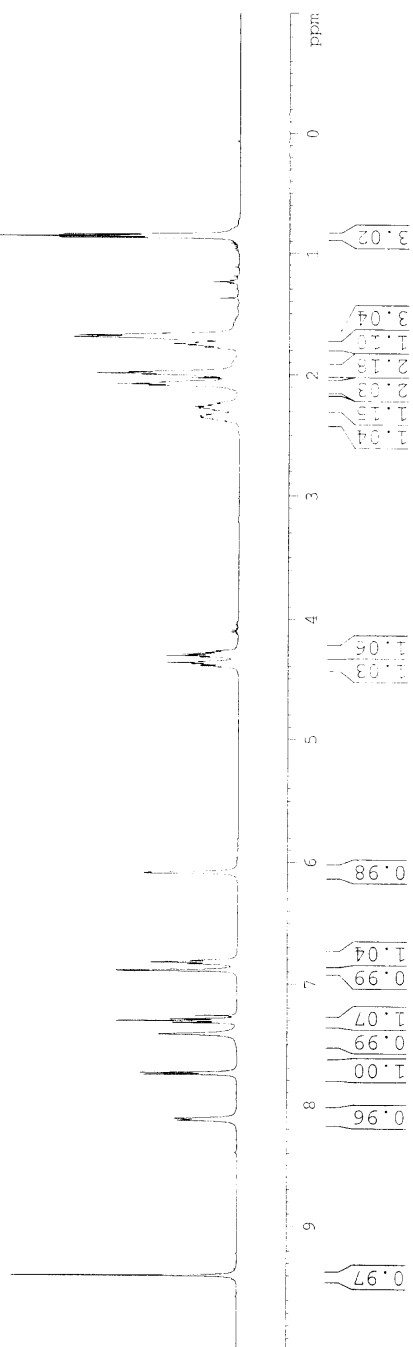

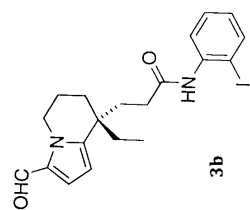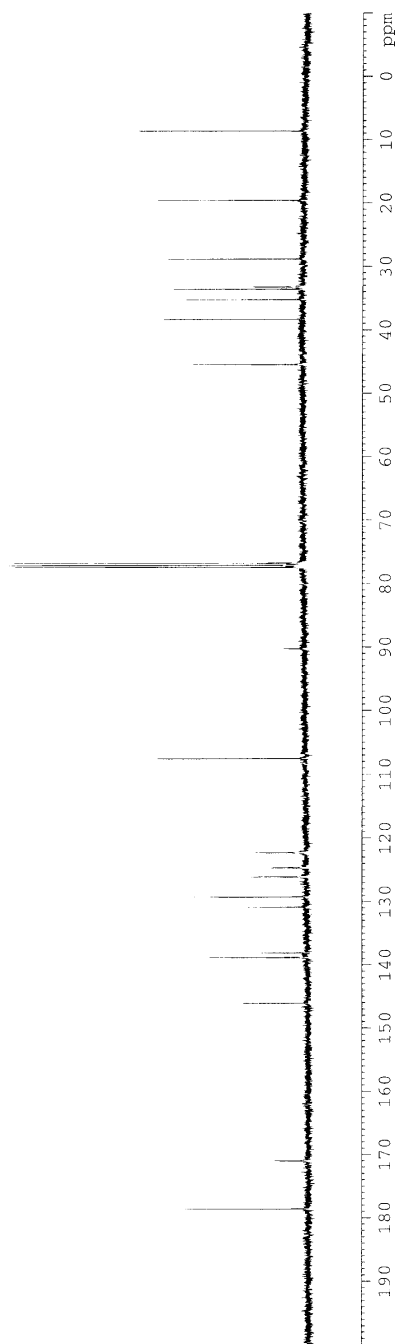

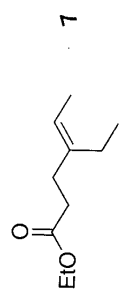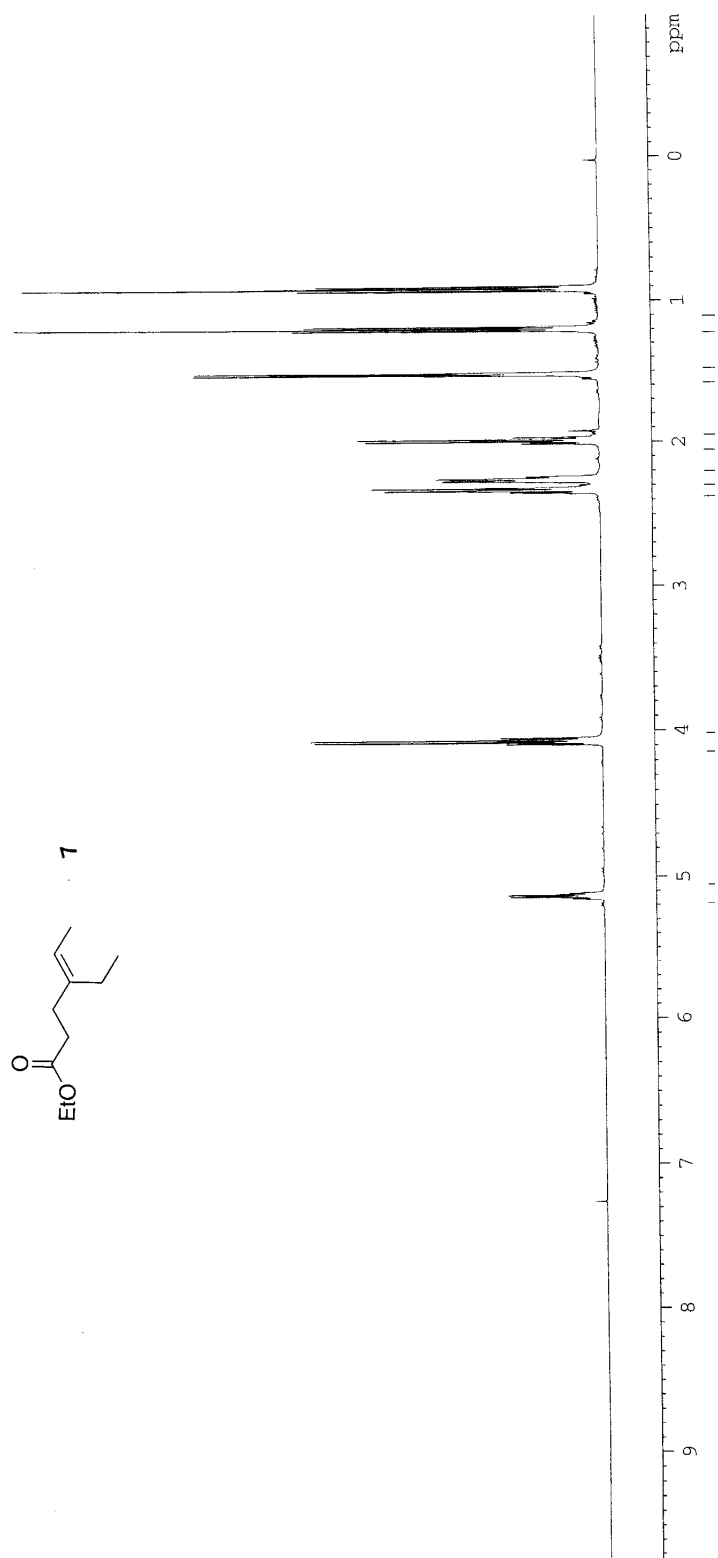

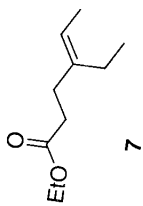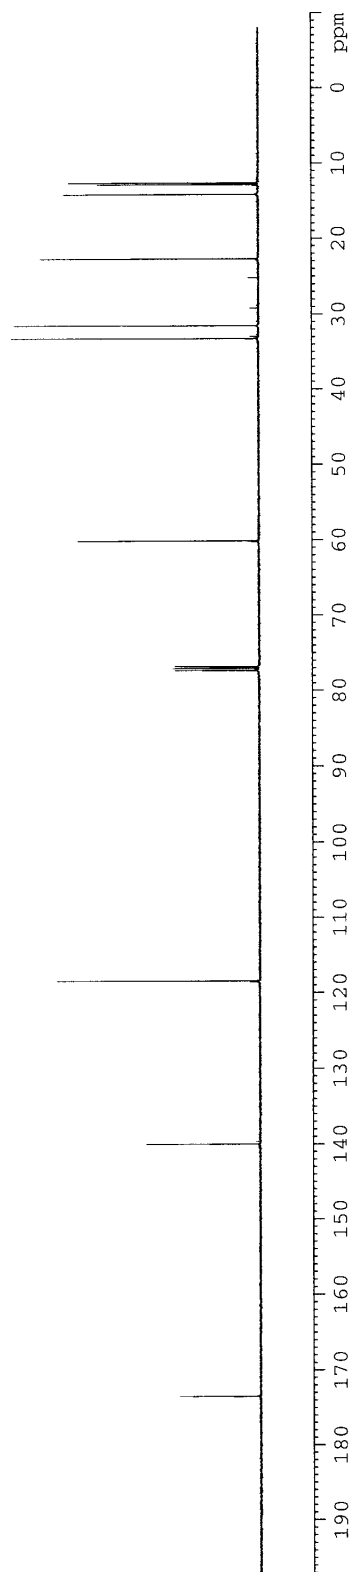

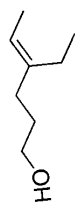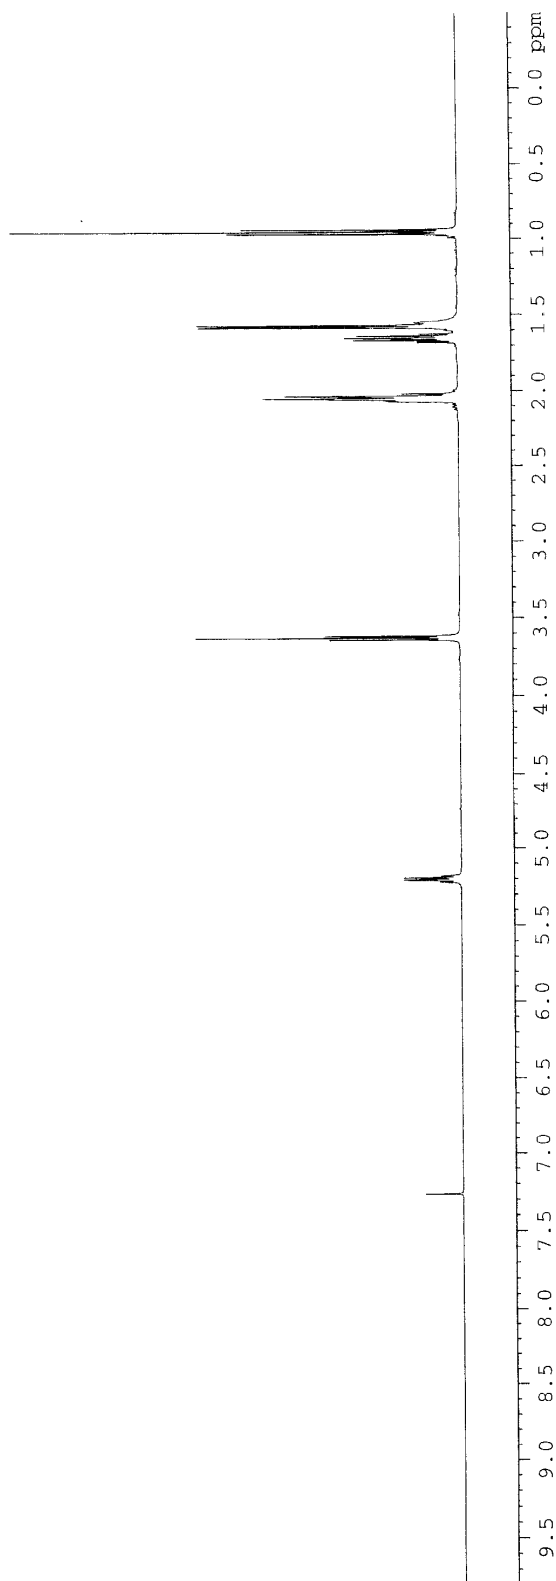

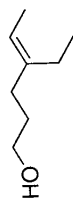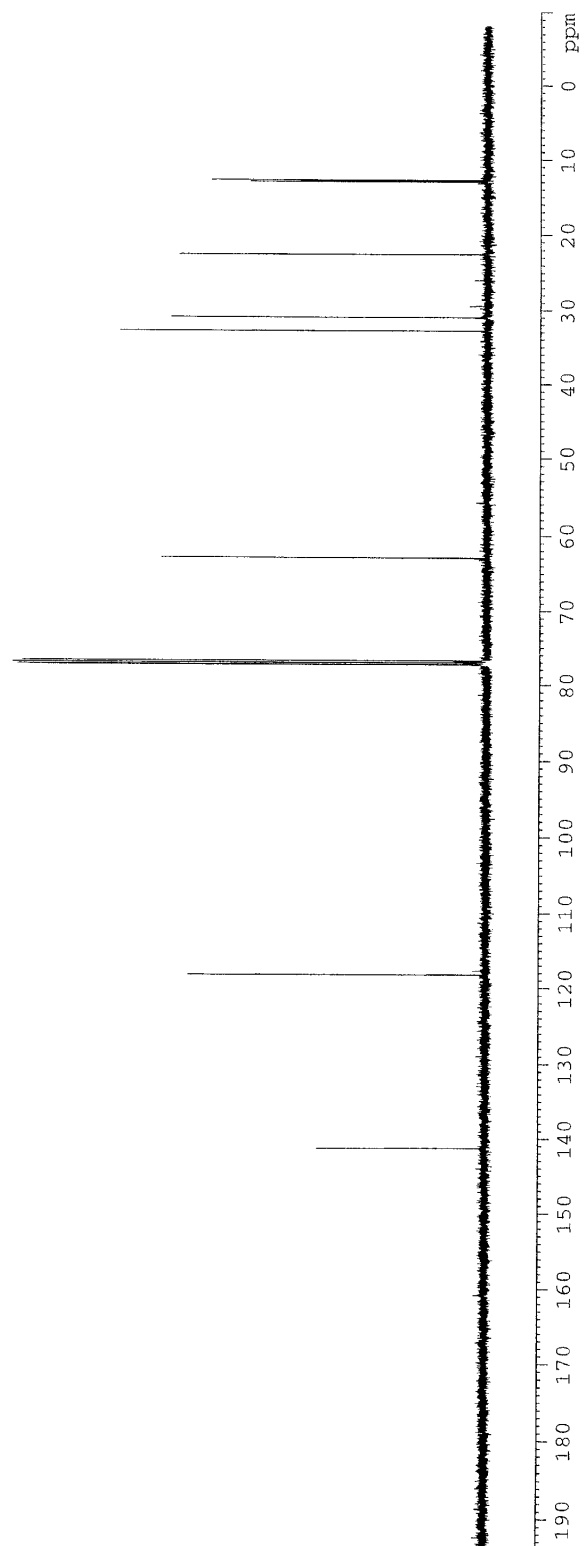

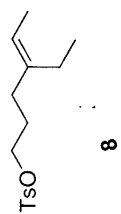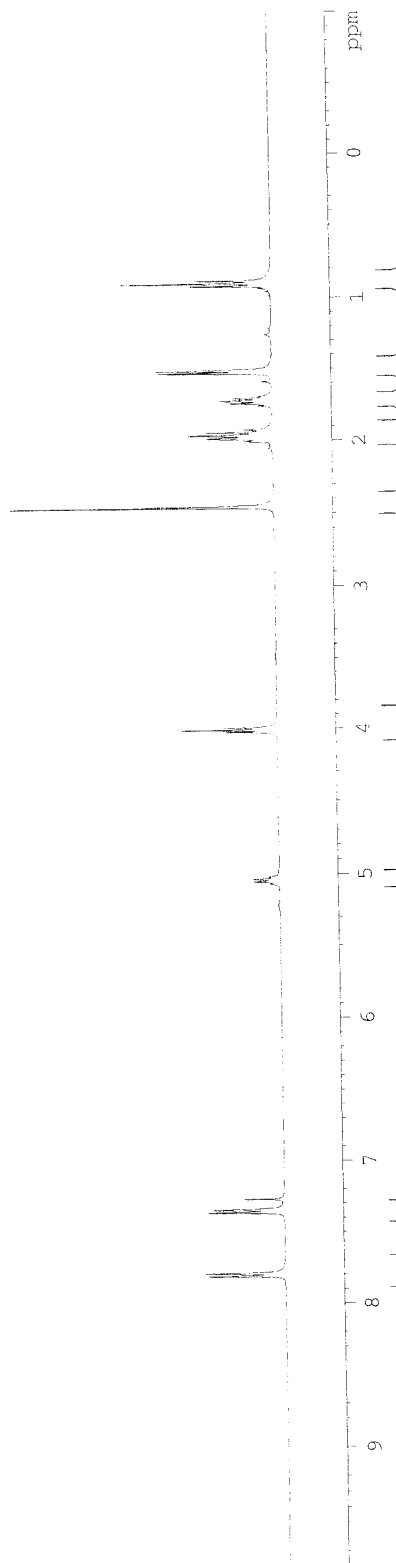



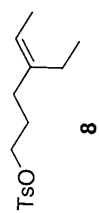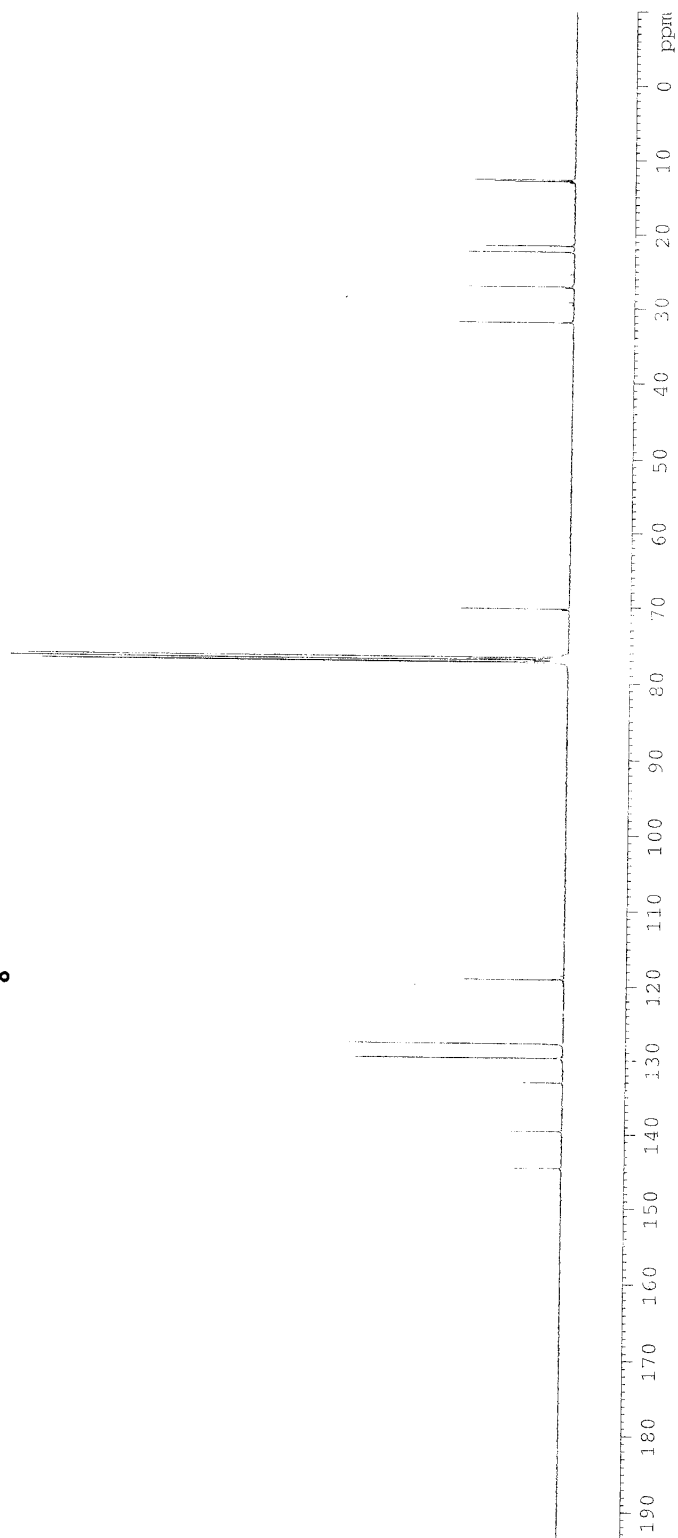

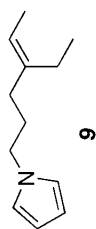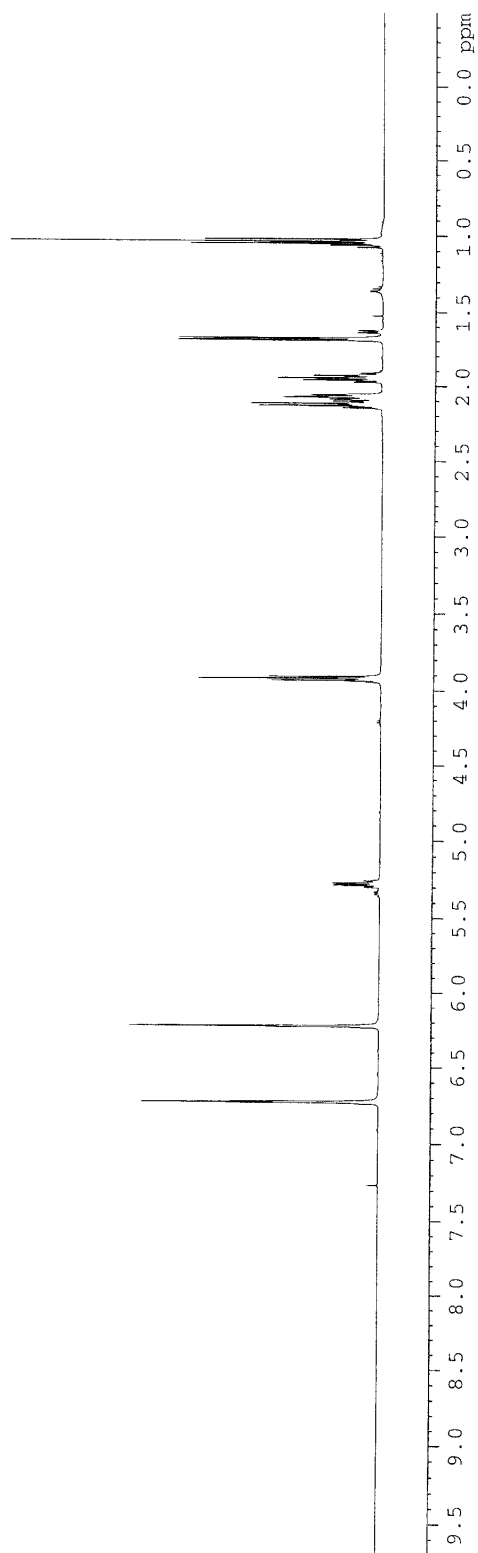

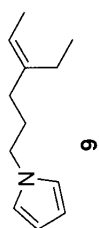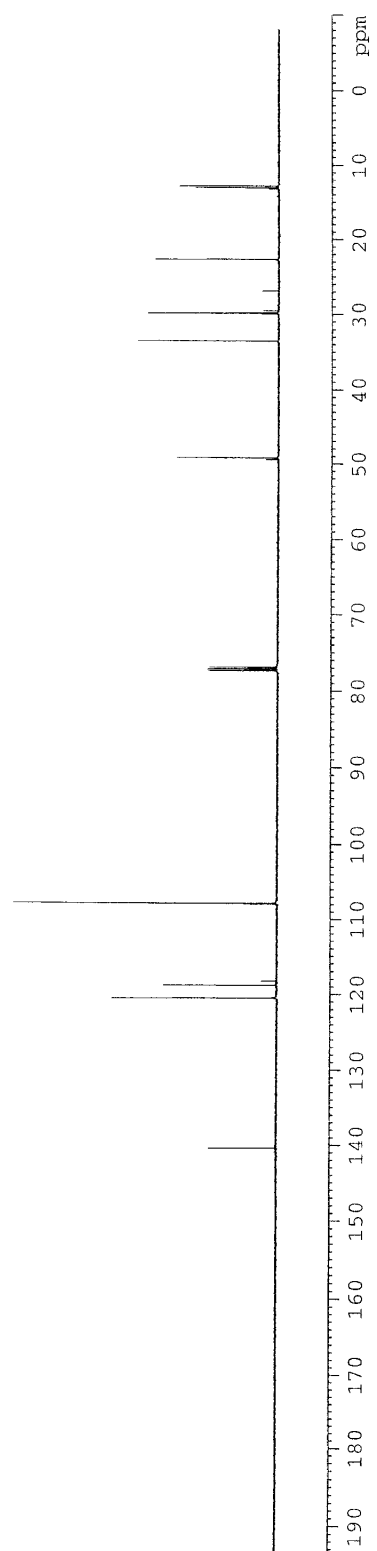

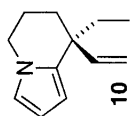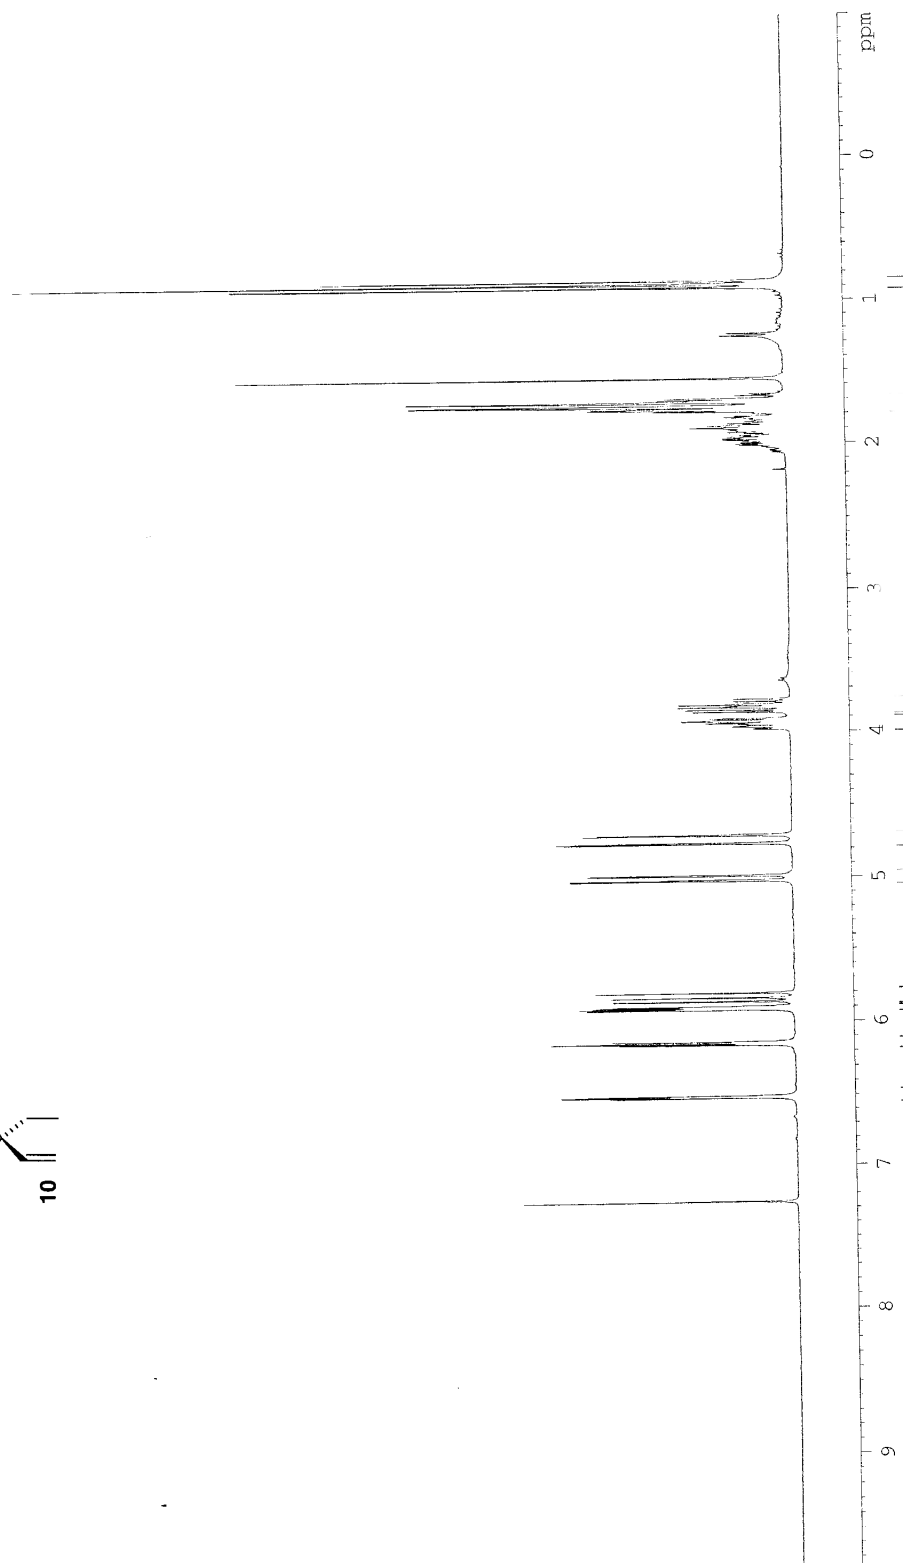

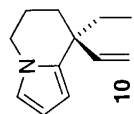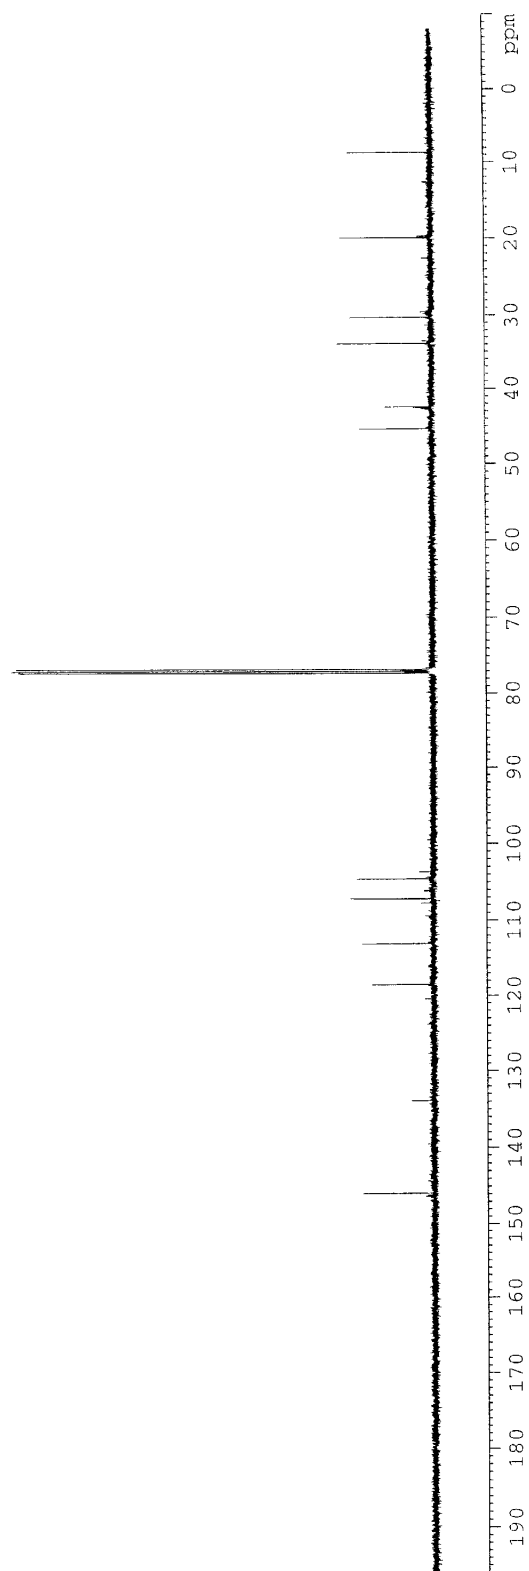

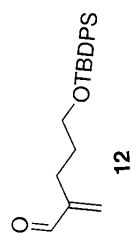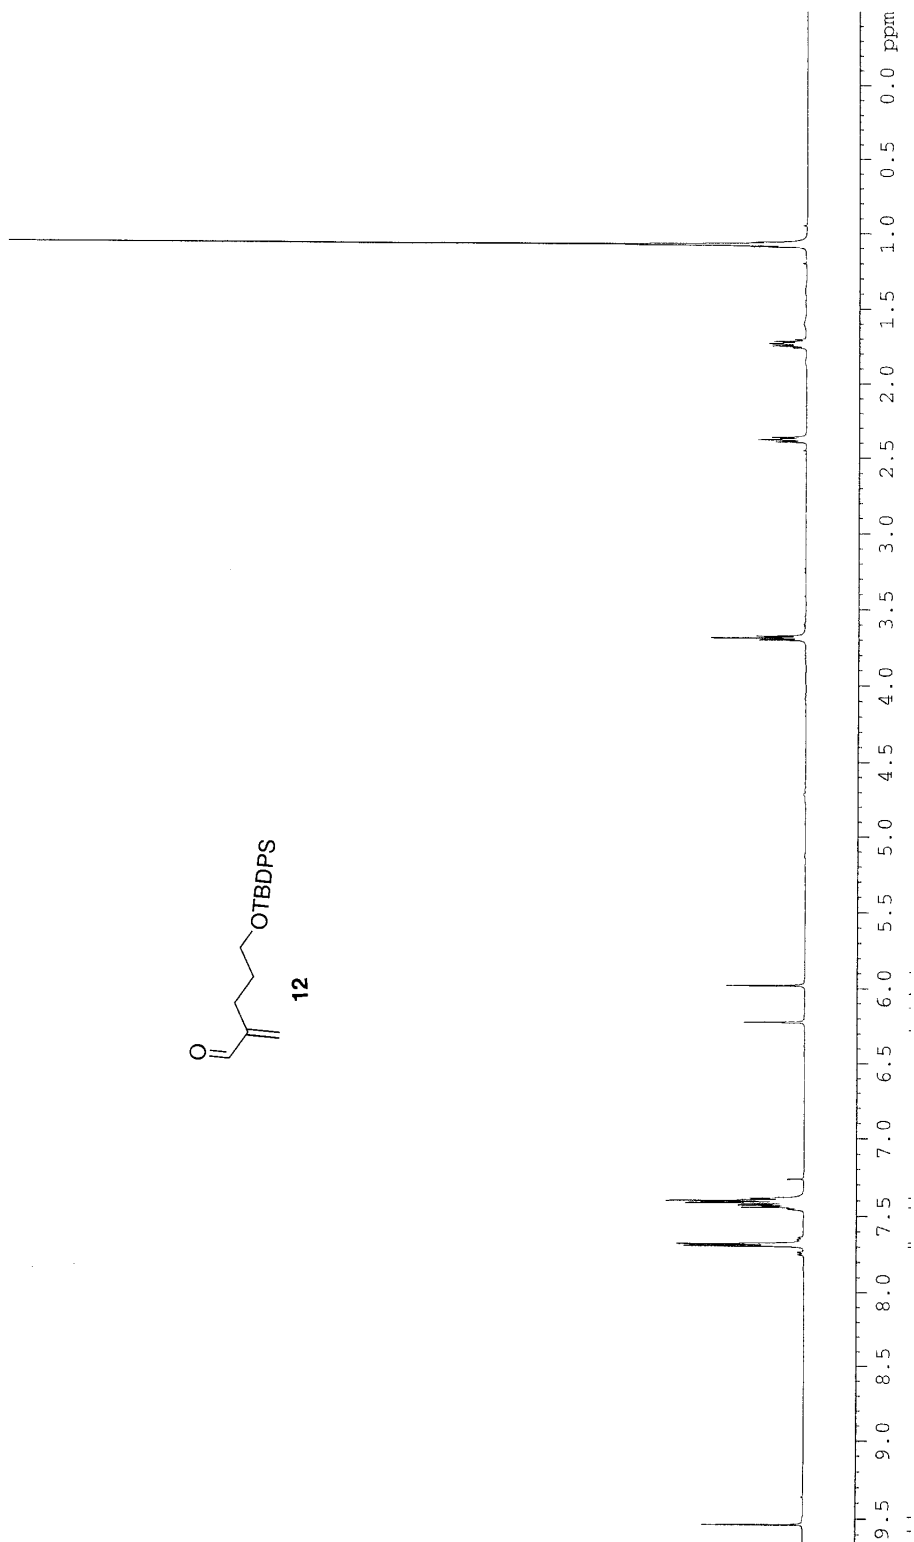

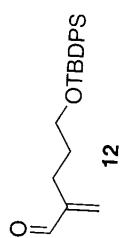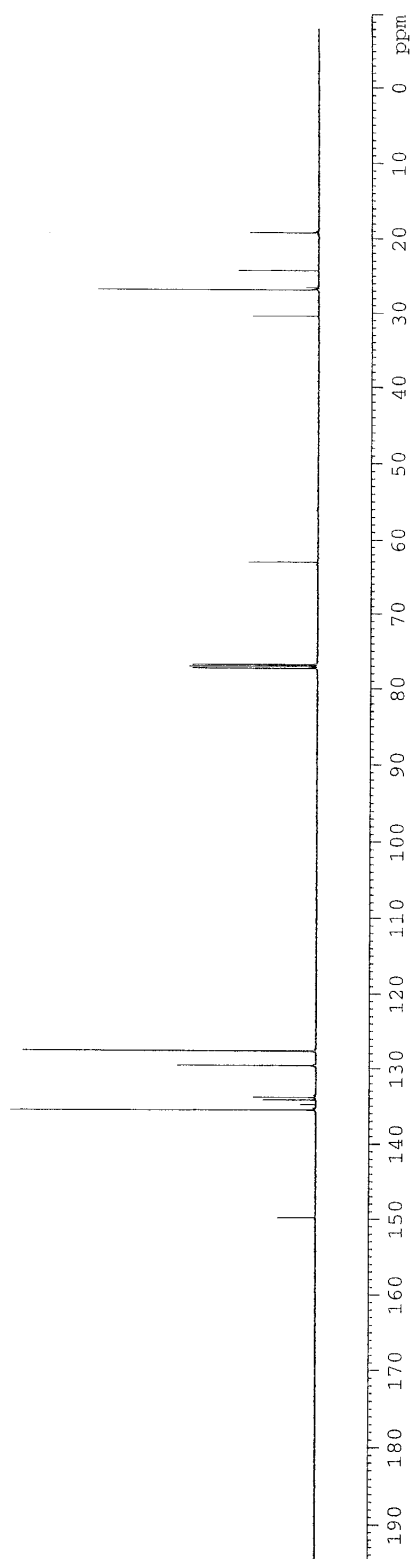

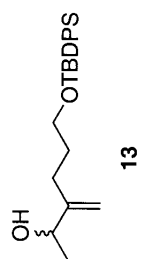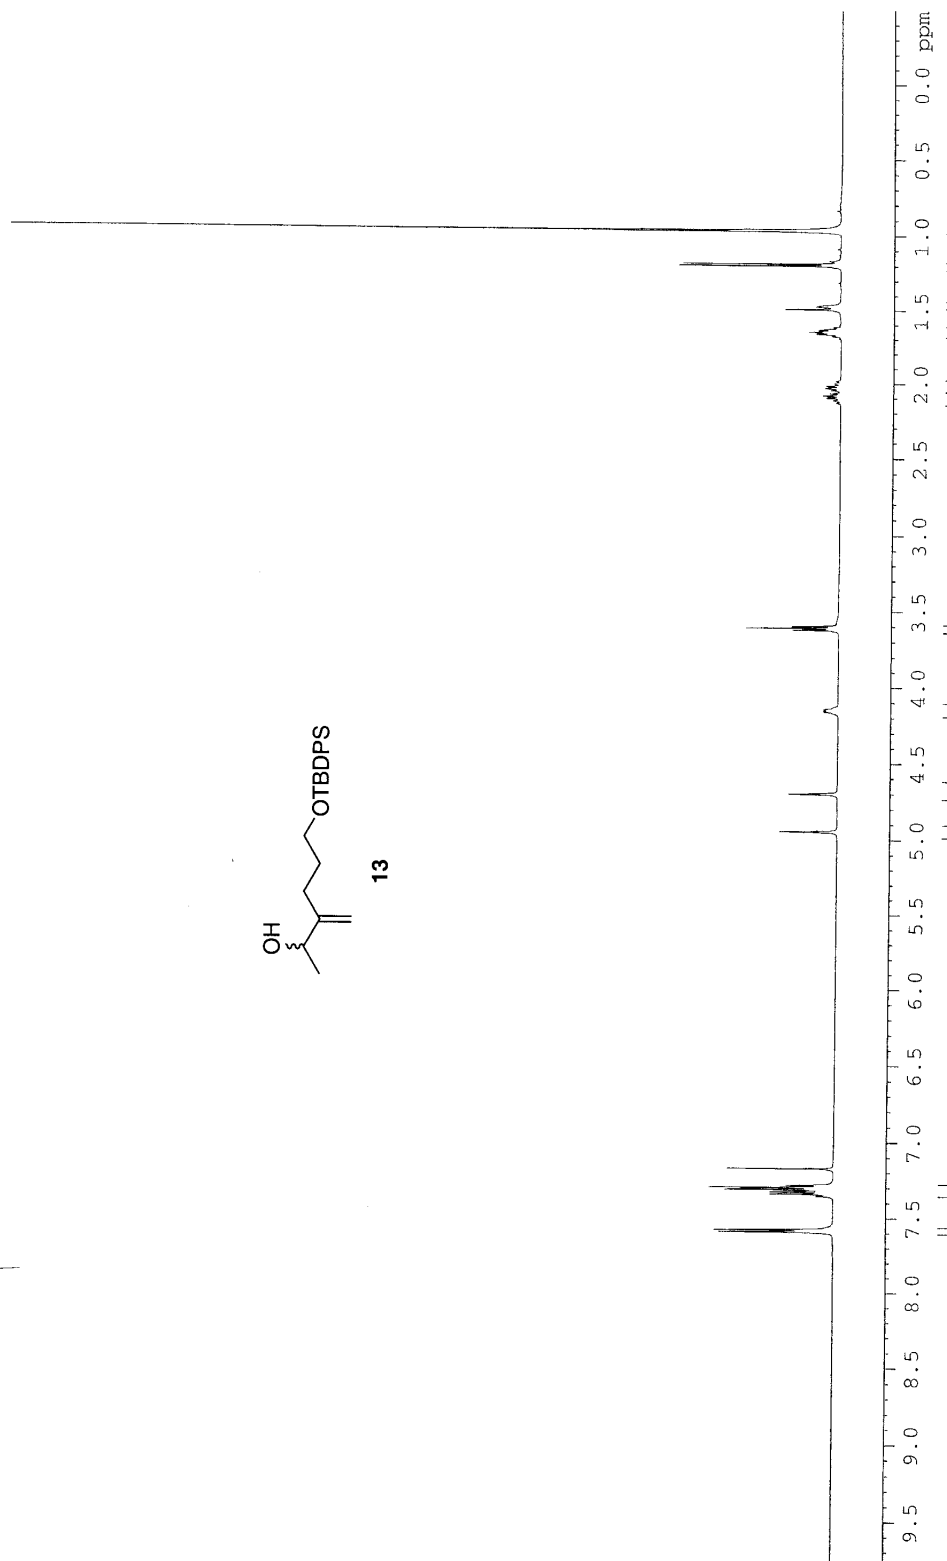



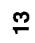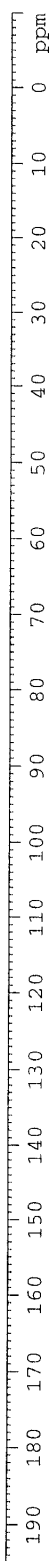

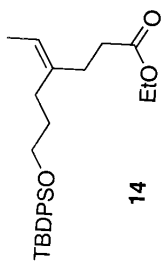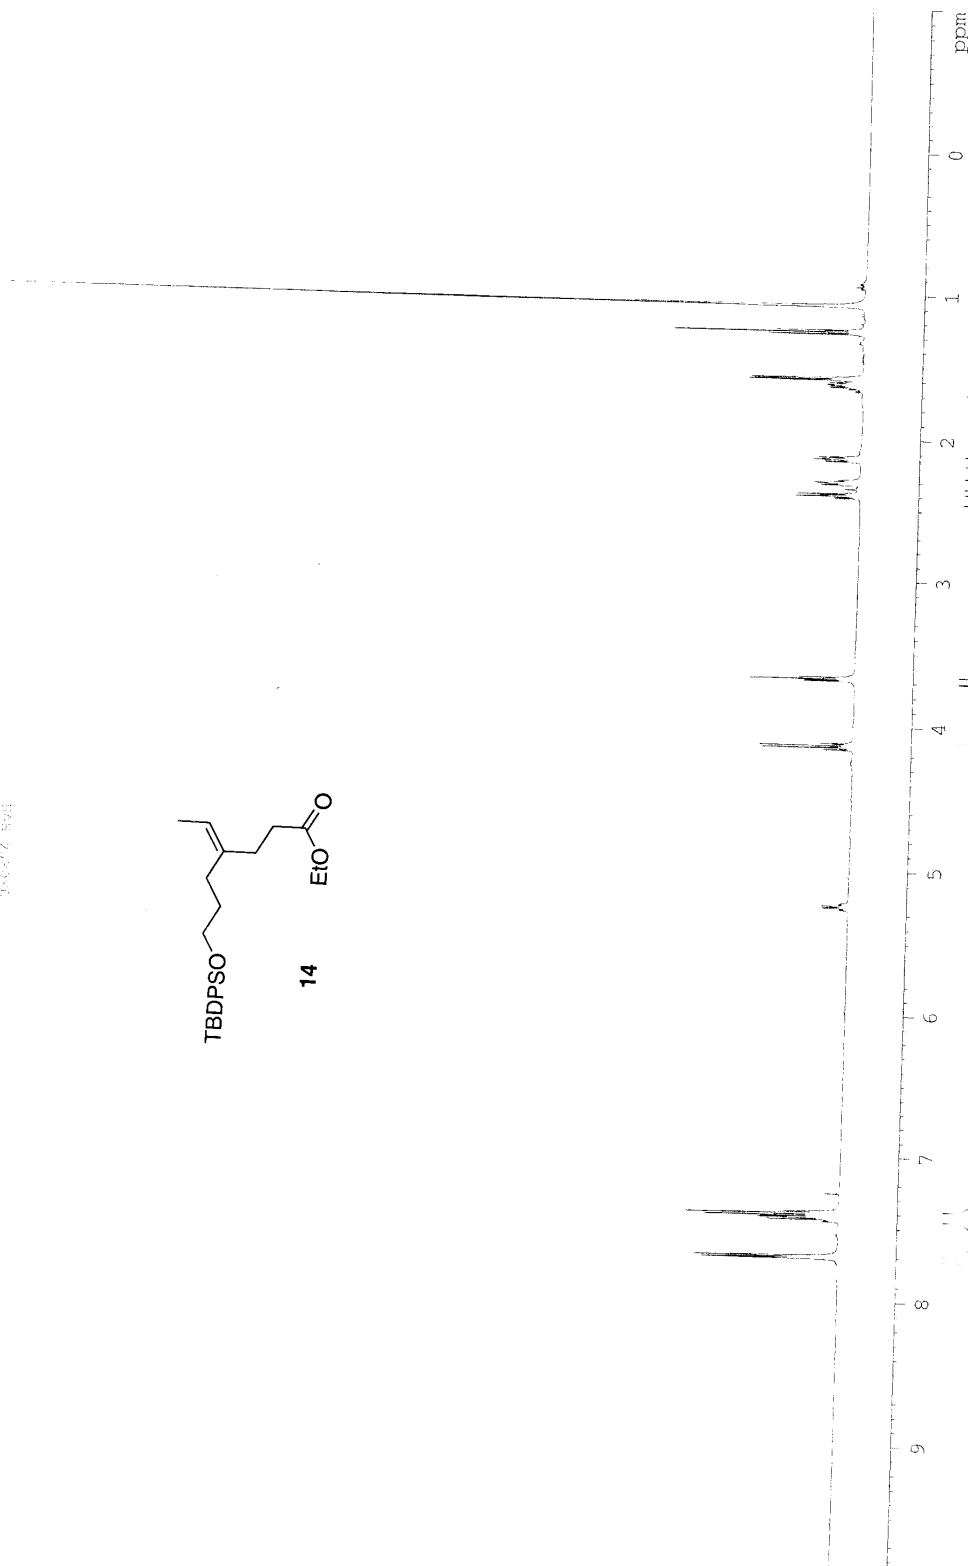

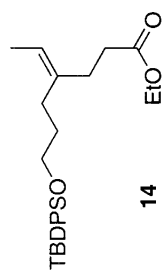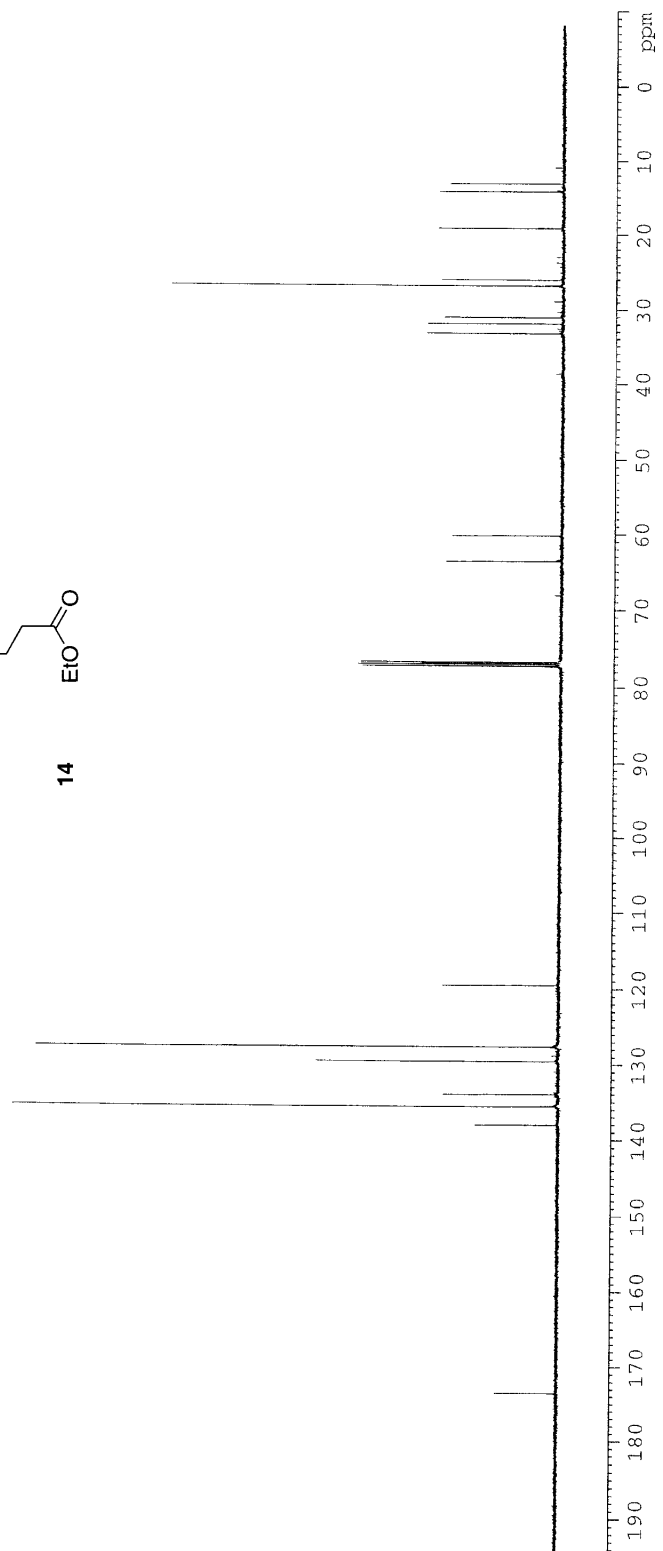

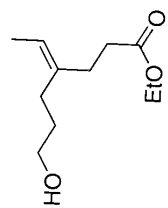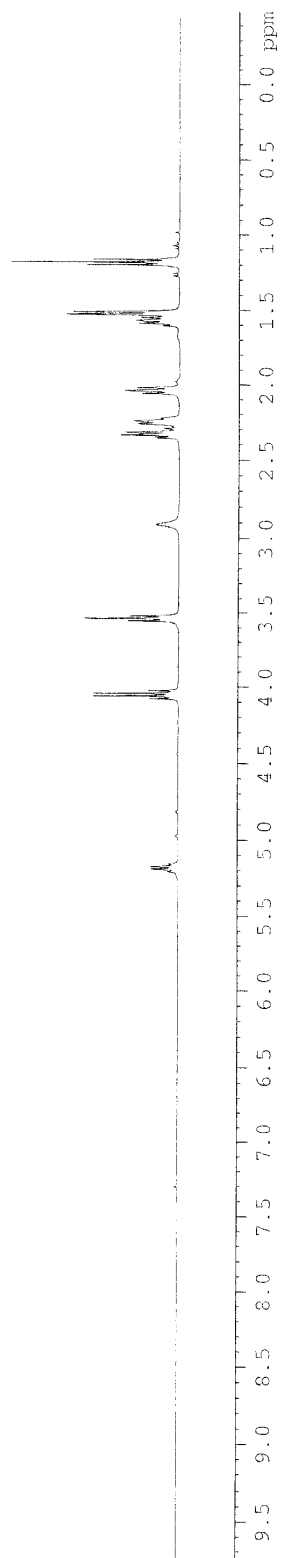

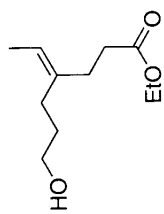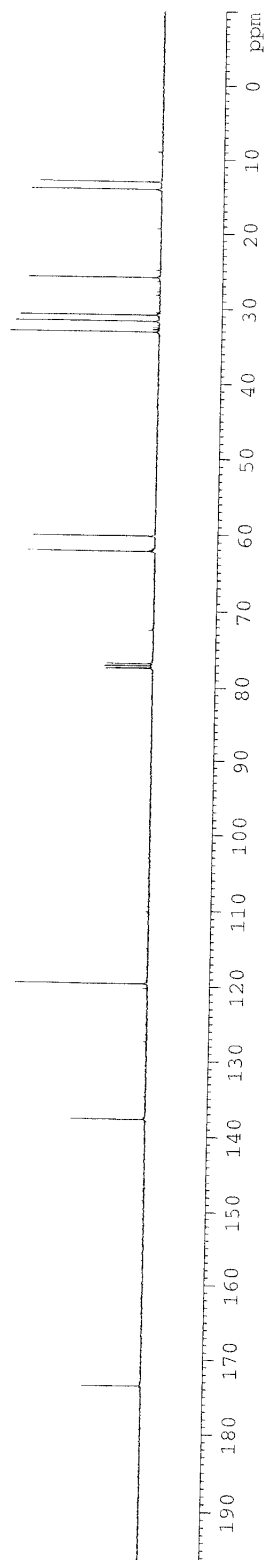

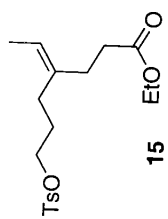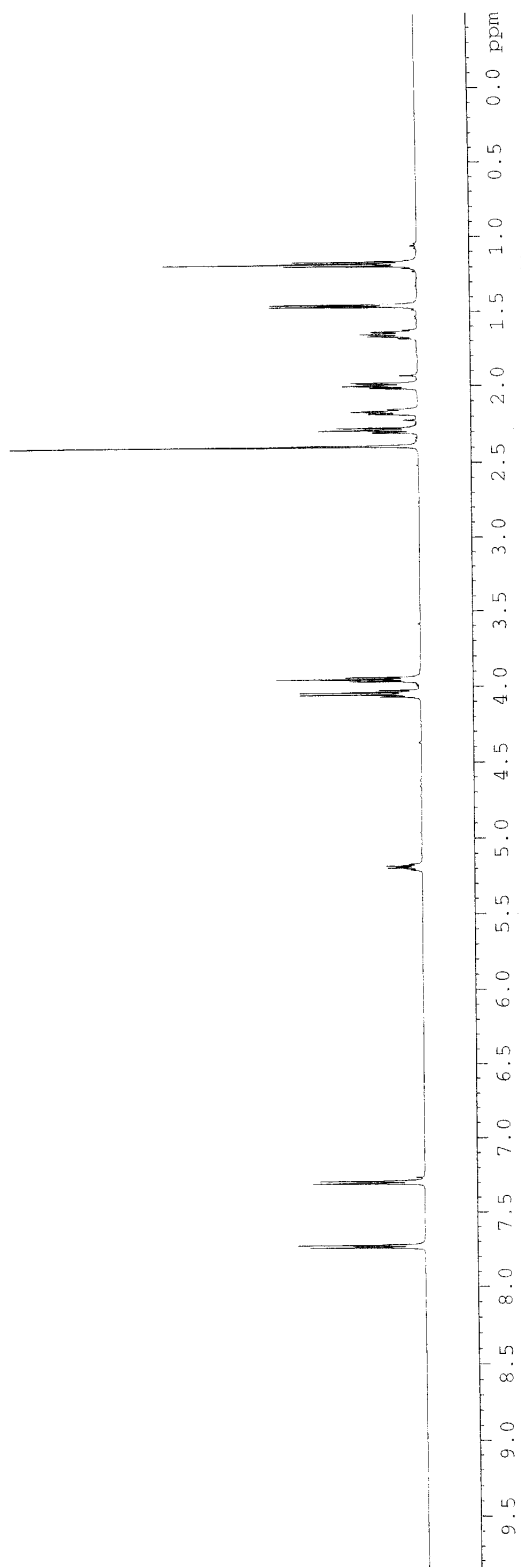

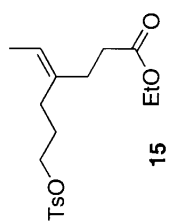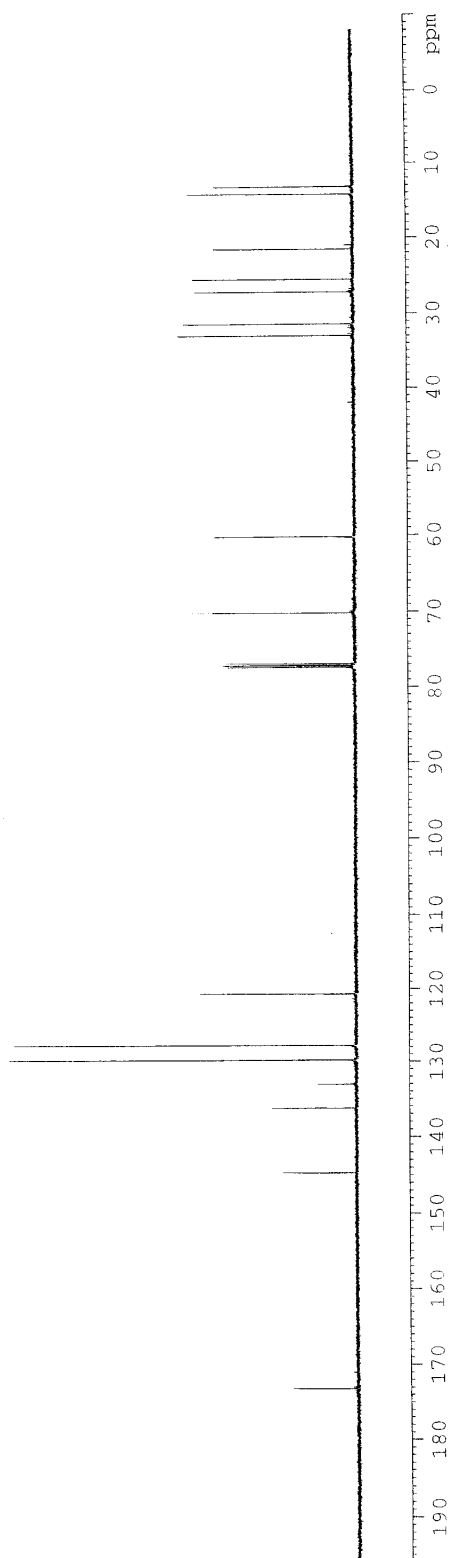

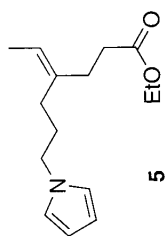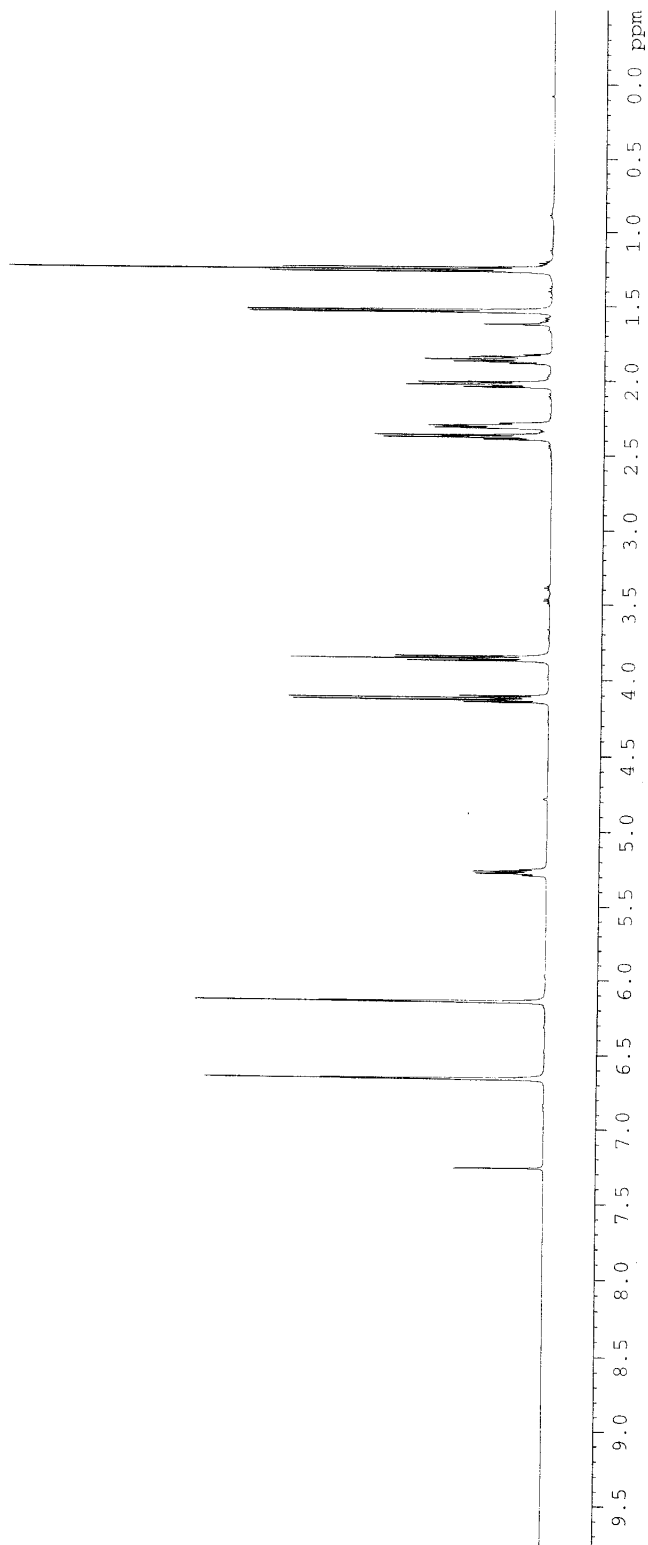



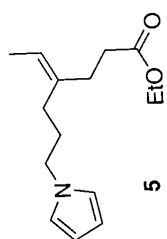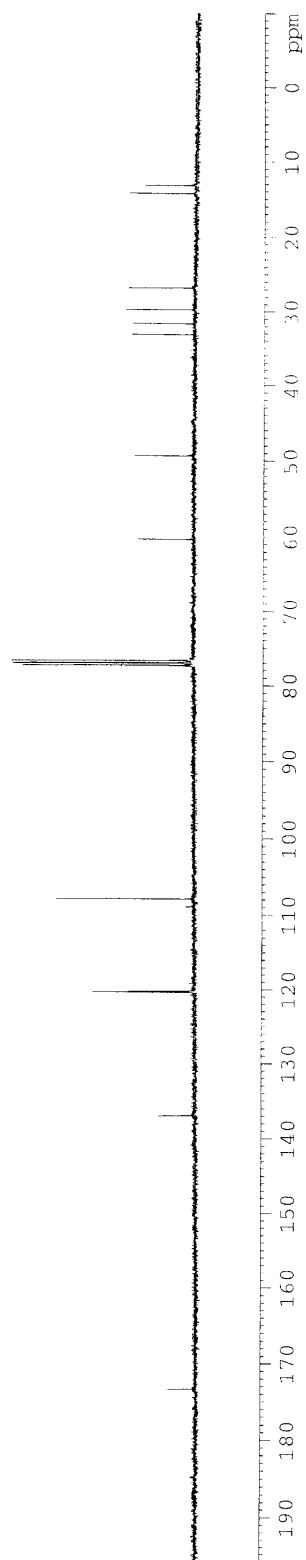

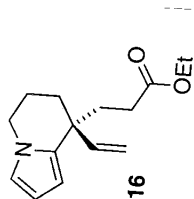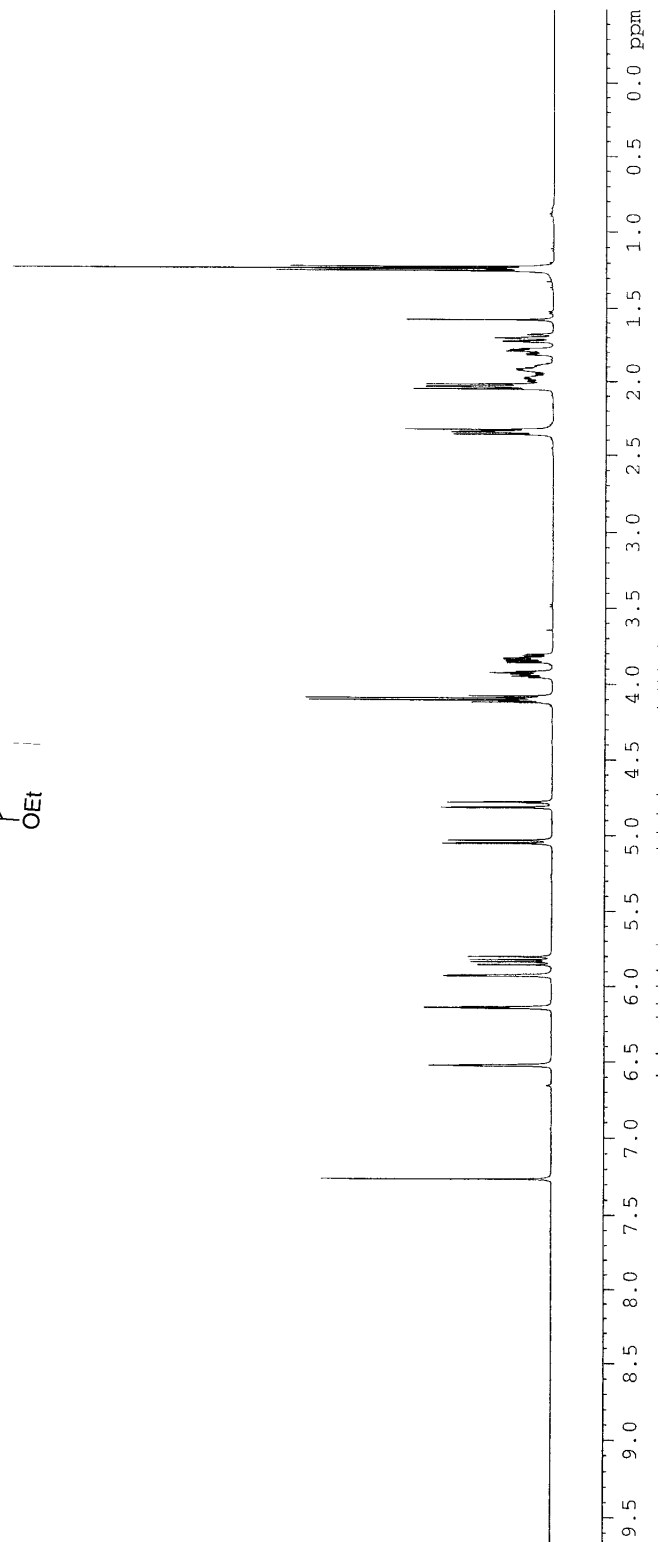

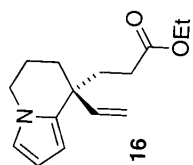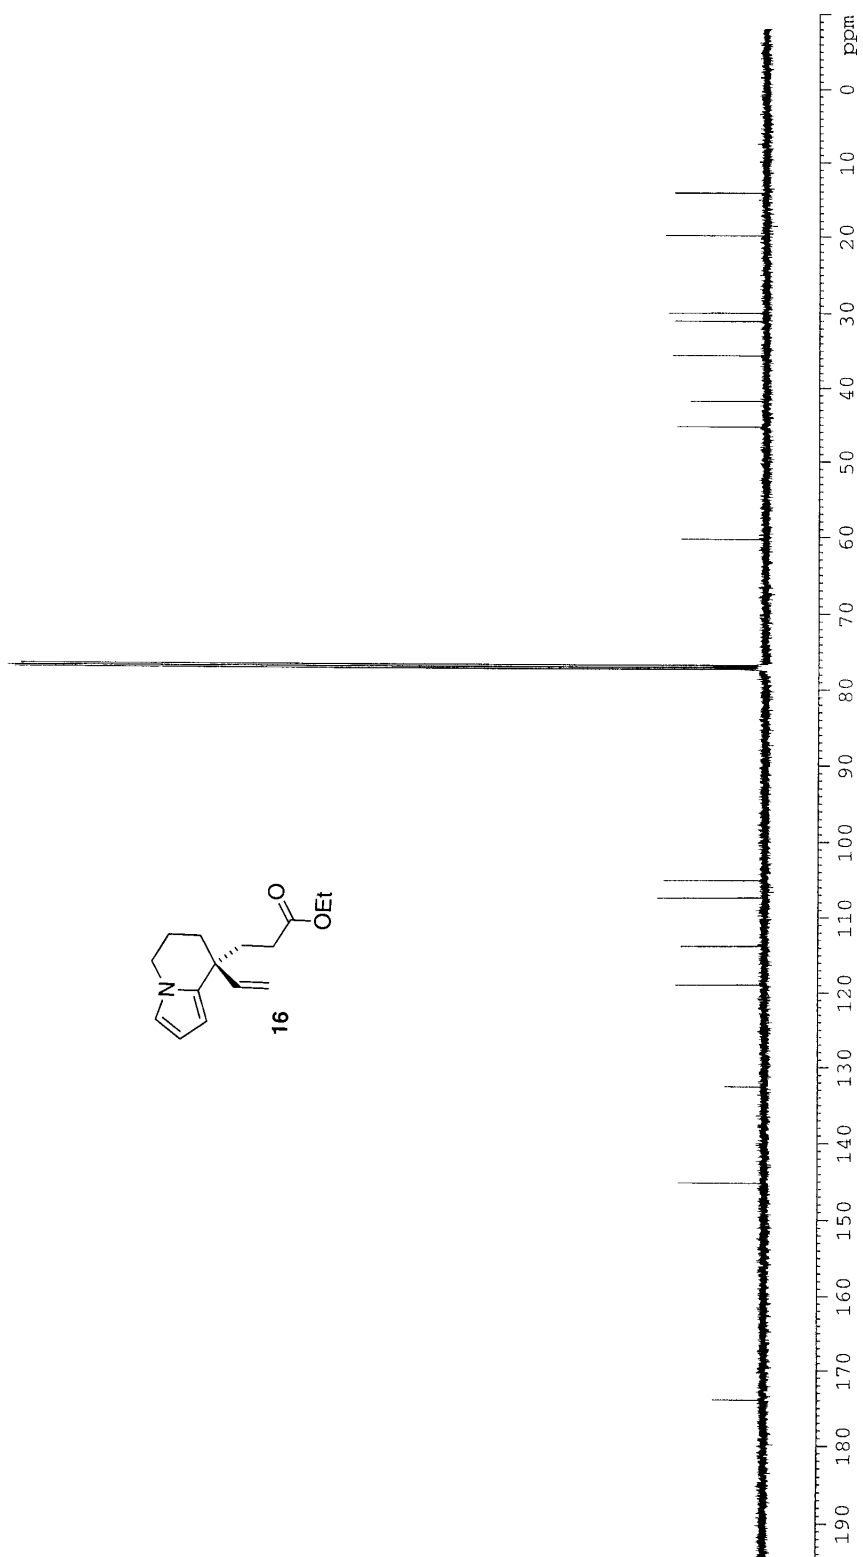

Current Data Parameters  
 Name: pyridotodide  
 PROCNO: 1  
 DU: /u  
 USER: freddie

F2 - Acquisition Parameters  
 Date\_: 2007.05.06  
 Time: 20.05  
 INSTRUM: DRX-500  
 PROBHD: 5 mm BBO BB-1H  
 PULPROG: zg30  
 TD: 65536  
 SOLVENT: CDCl3  
 NS: 8  
 DS: 4  
 SWH: 10000.000 Hz  
 FIDRES: 0.152588 Hz  
 AQ: 3.2768500 sec  
 RG: 203.2  
 DW: 50.000 usec  
 DE: 2.00 usec  
 TE: 300.2 K  
 DI: 1.00000000 sec  
 MCREST: 0.00000000 sec  
 MCWRE: 0.01500000 sec

===== CHANNEL f1 =====  
 NUC1: 1H  
 P1: 12.00 usec  
 PL1: 0.00 dB  
 SFO1: 500.1330833 MHz

F2 - Processing parameters  
 SI: 65536  
 SF: 500.1300137 MHz  
 XWDW: BK  
 SSB: 0  
 LB: 0.40 Hz  
 GB: 0  
 PC: 5.40

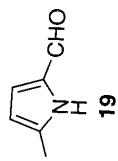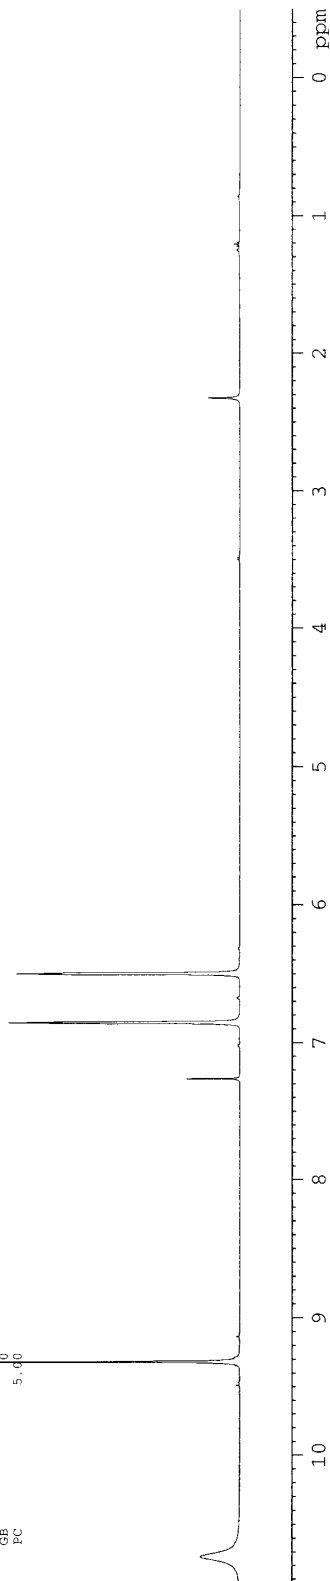

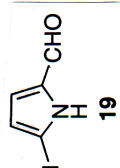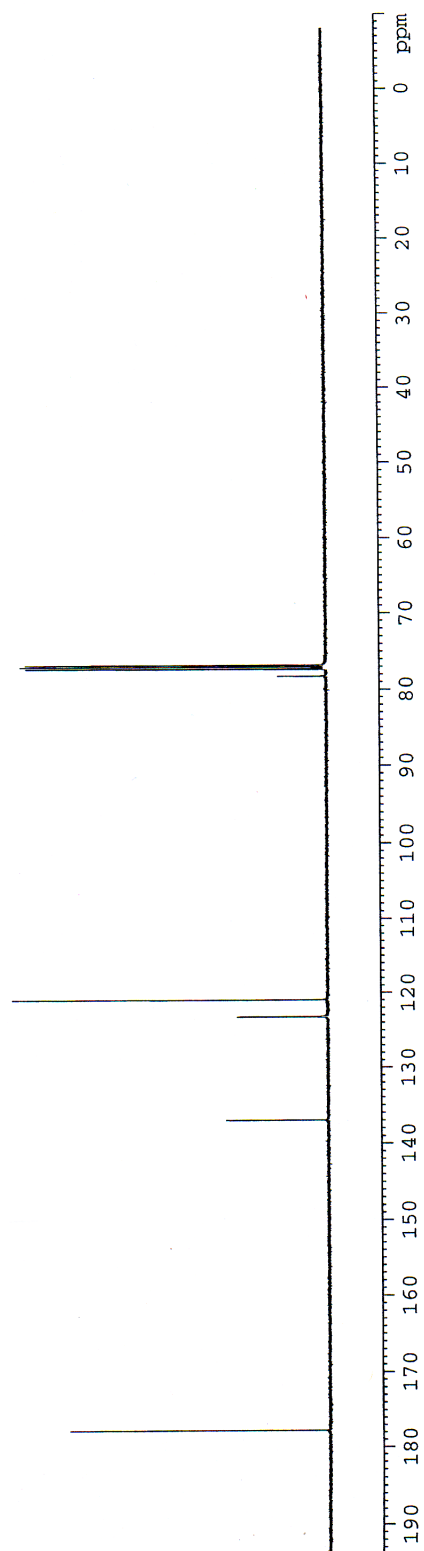

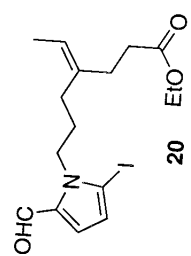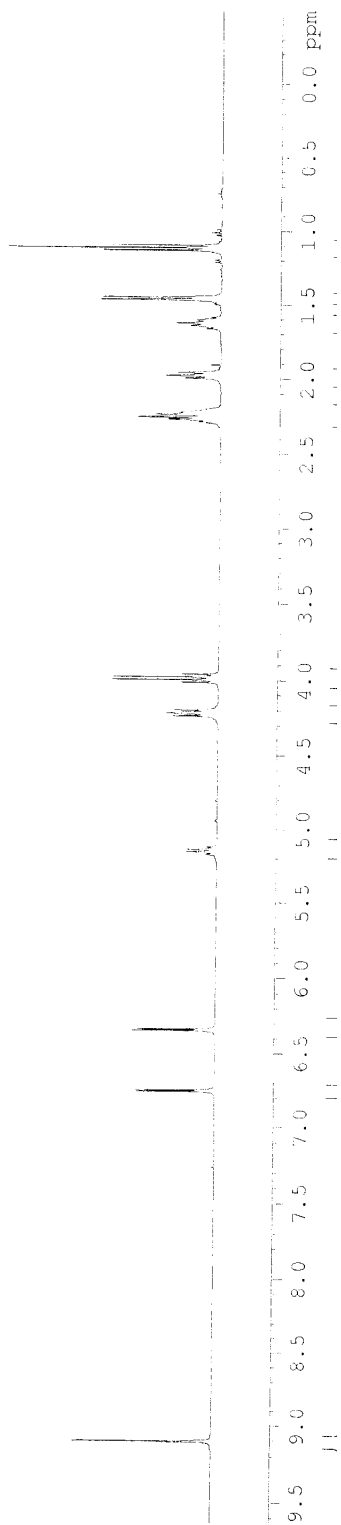

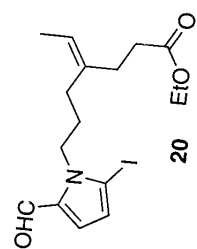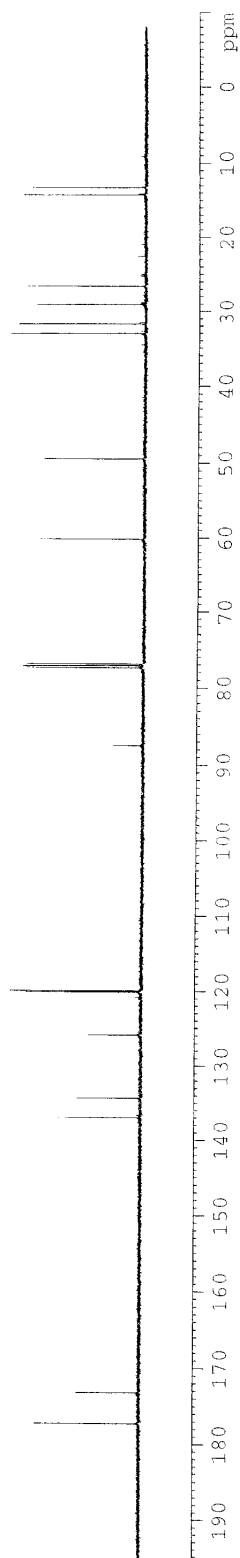

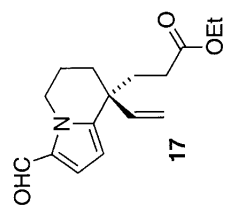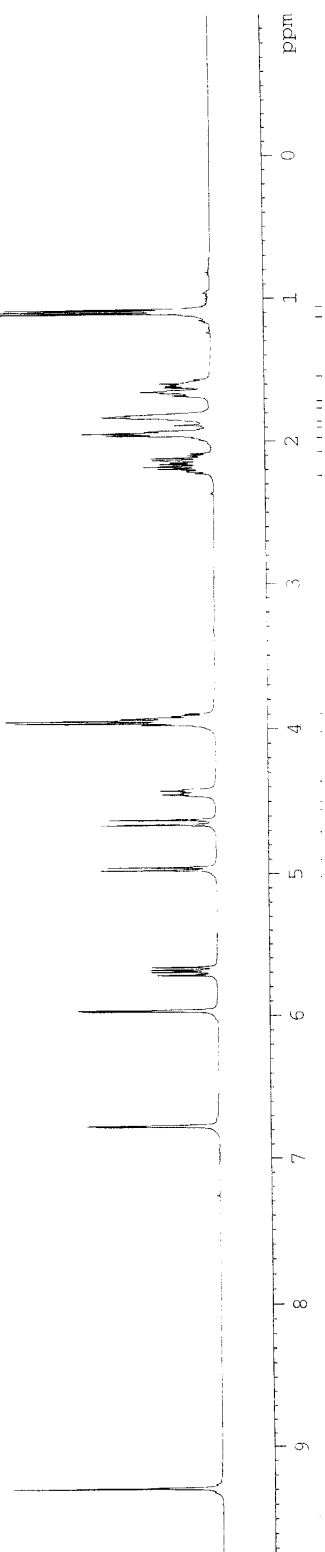



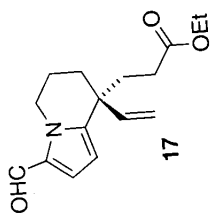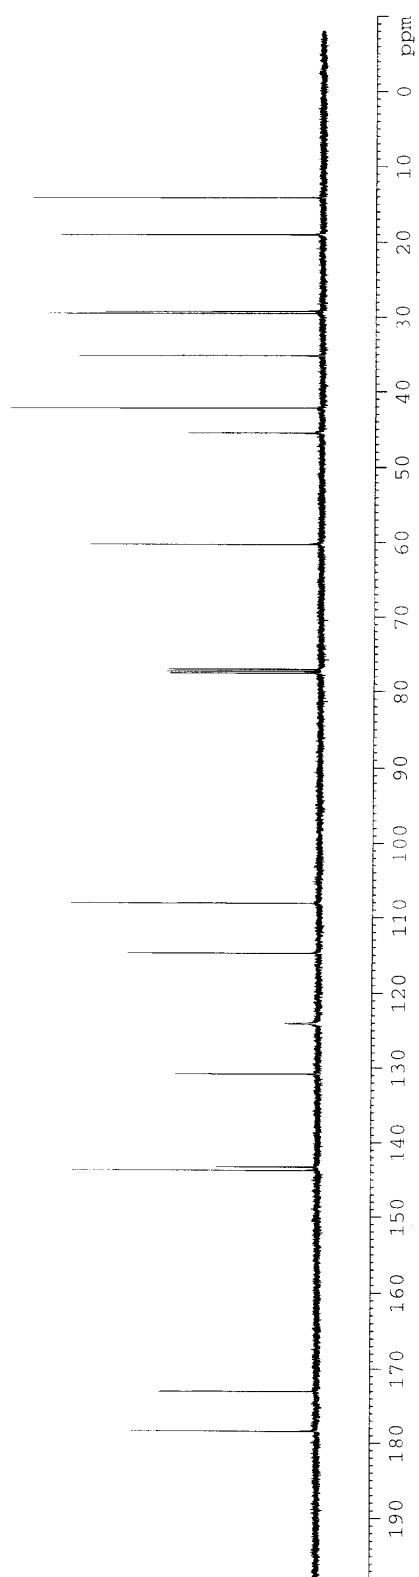

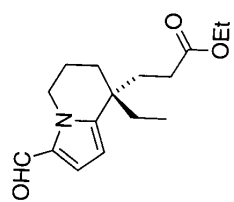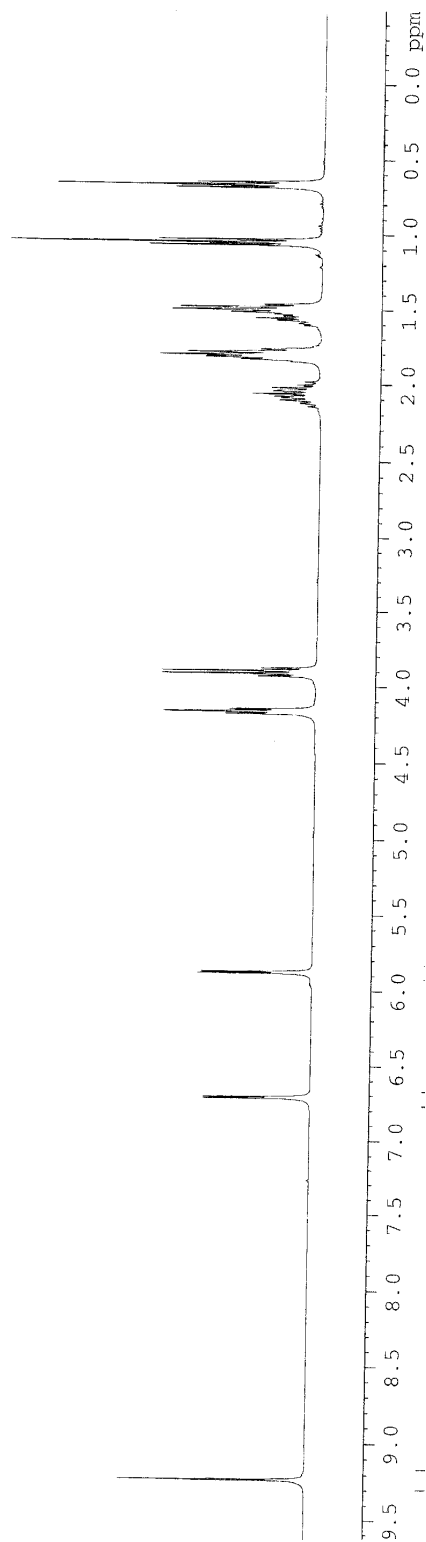

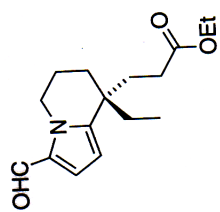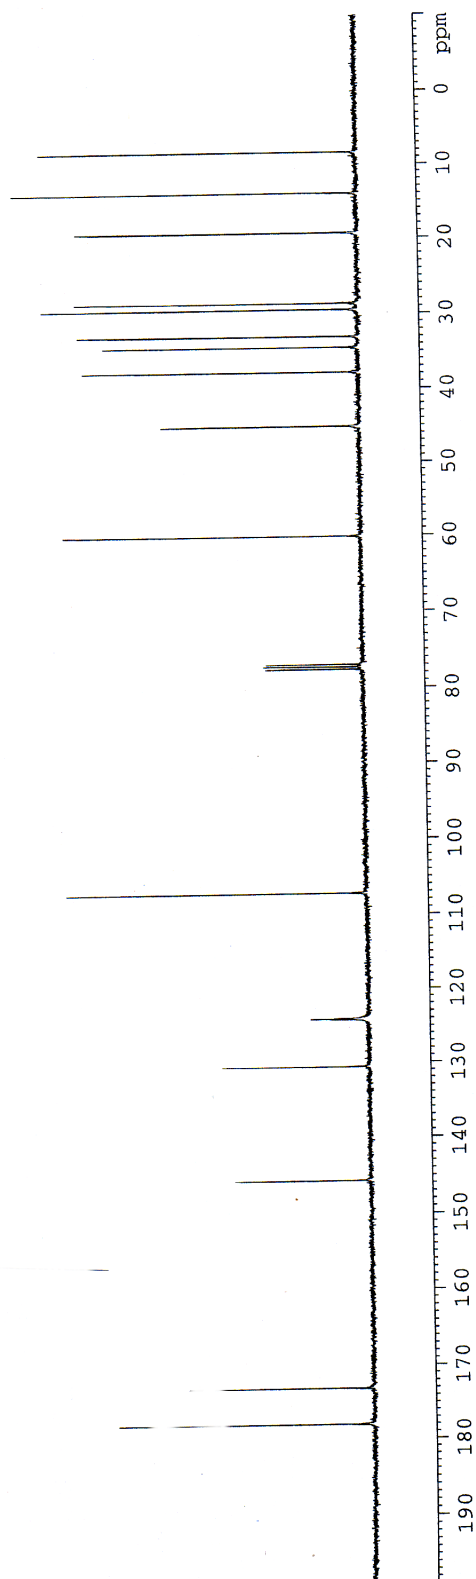

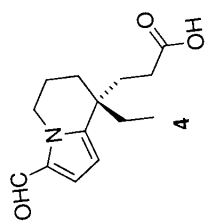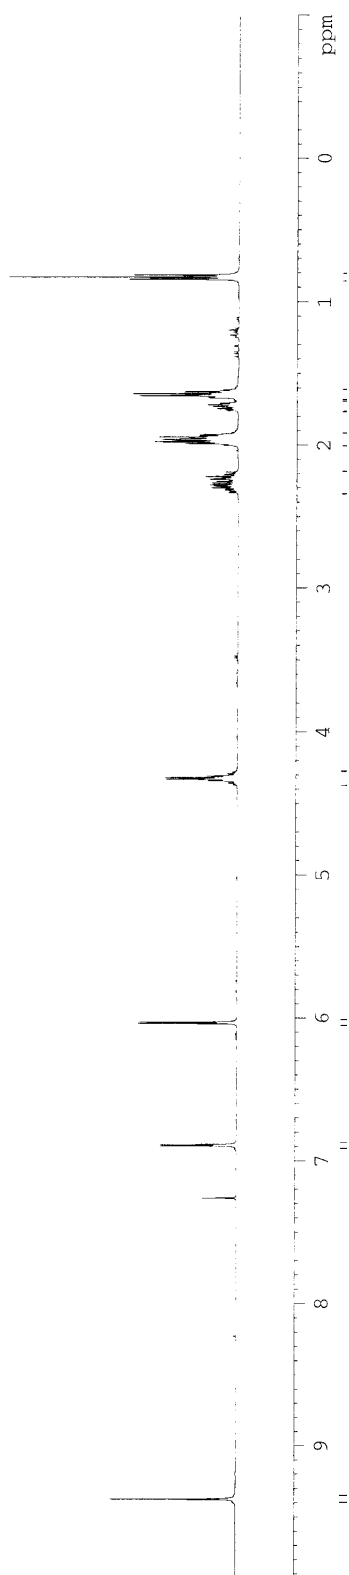

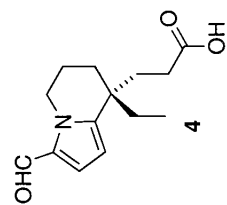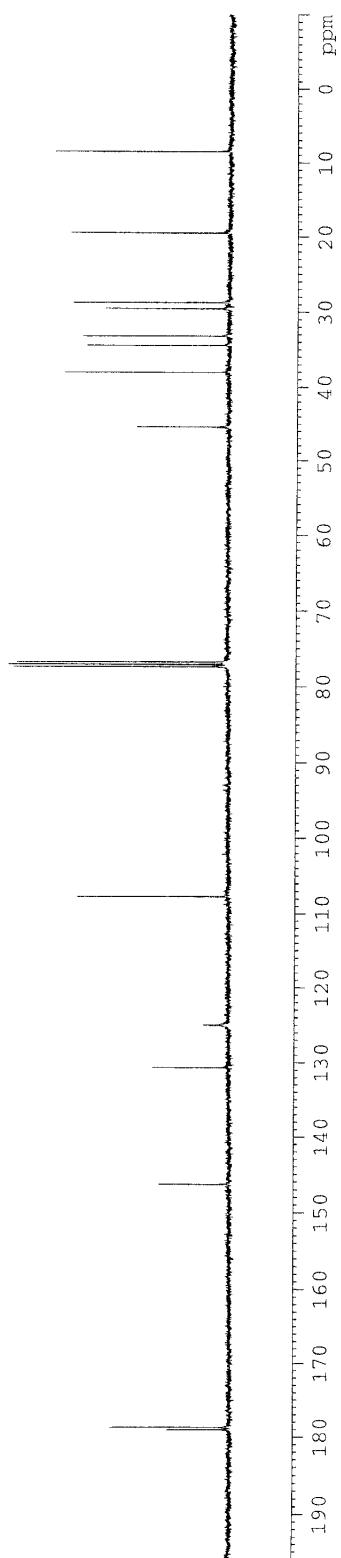

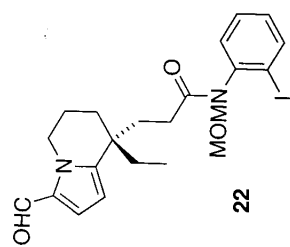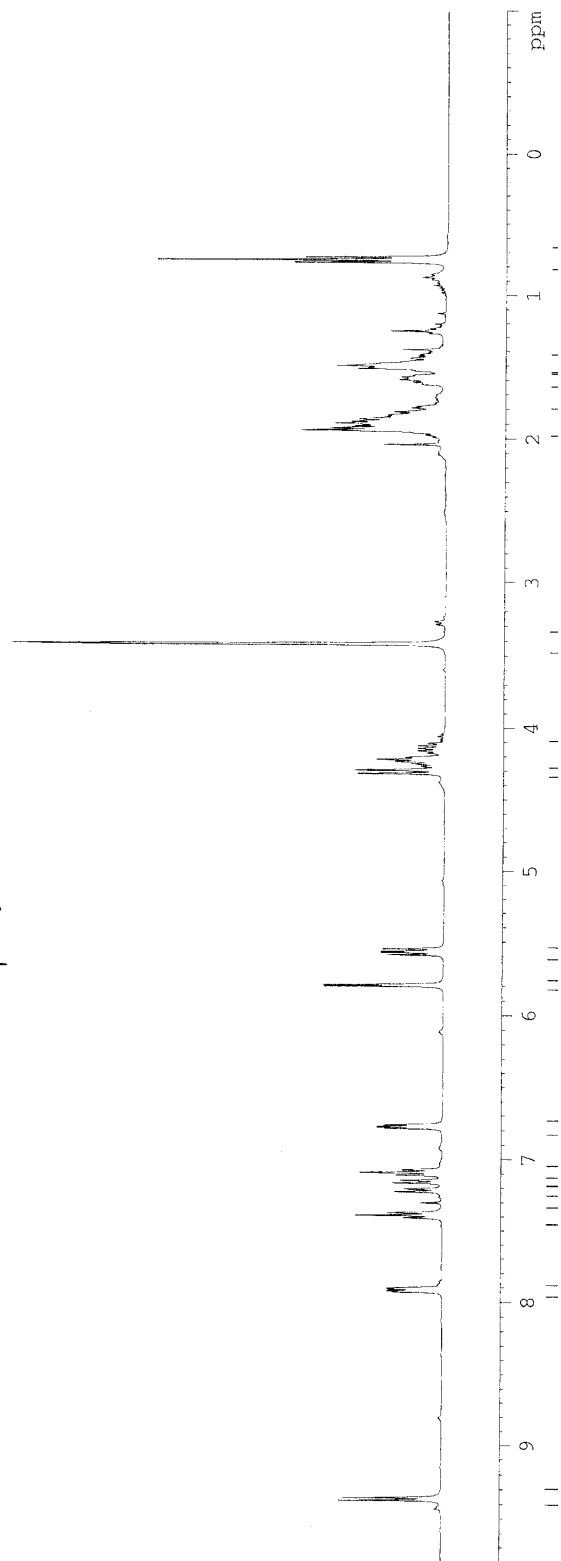

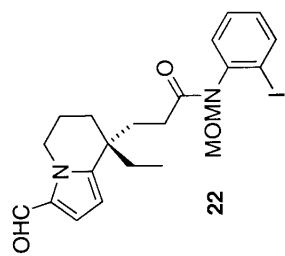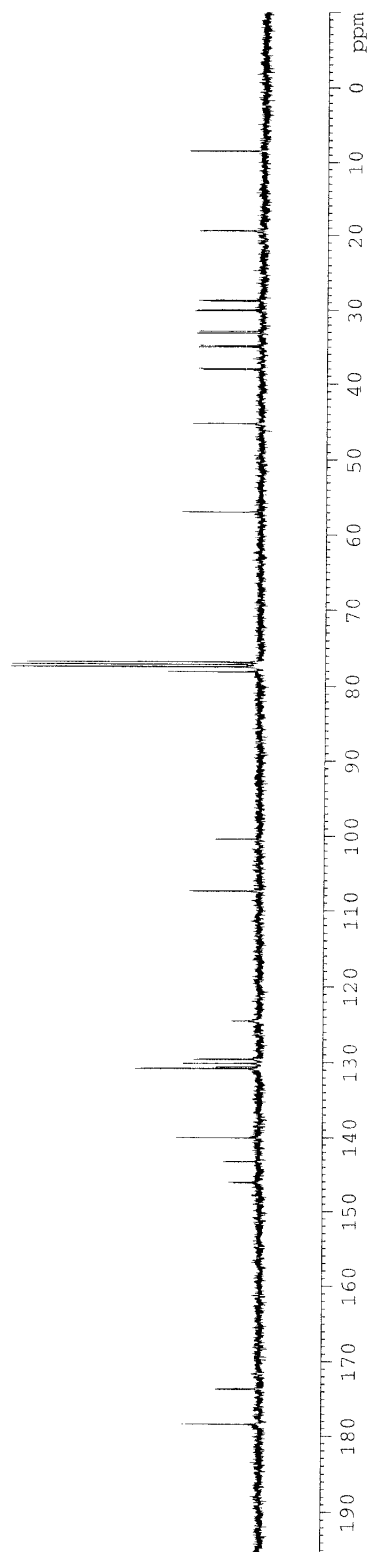

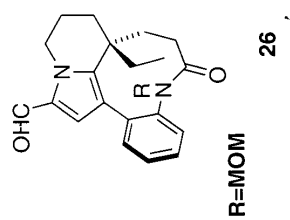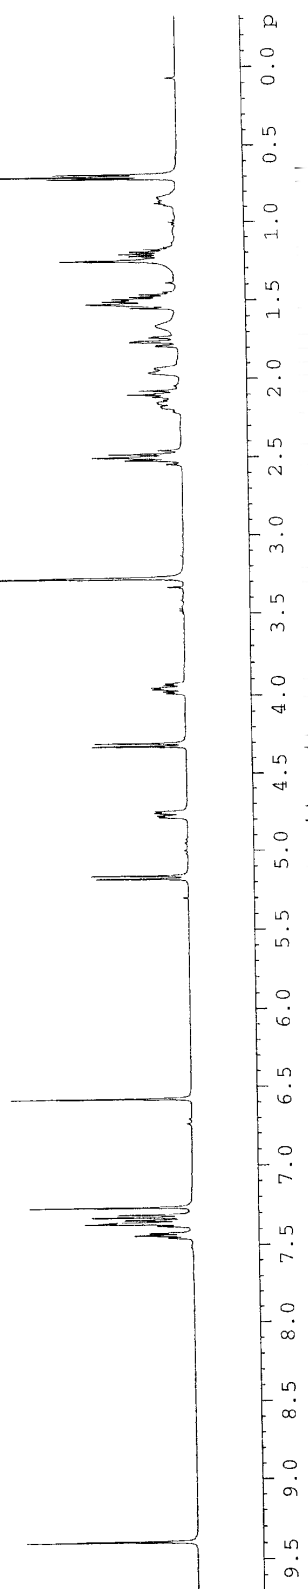



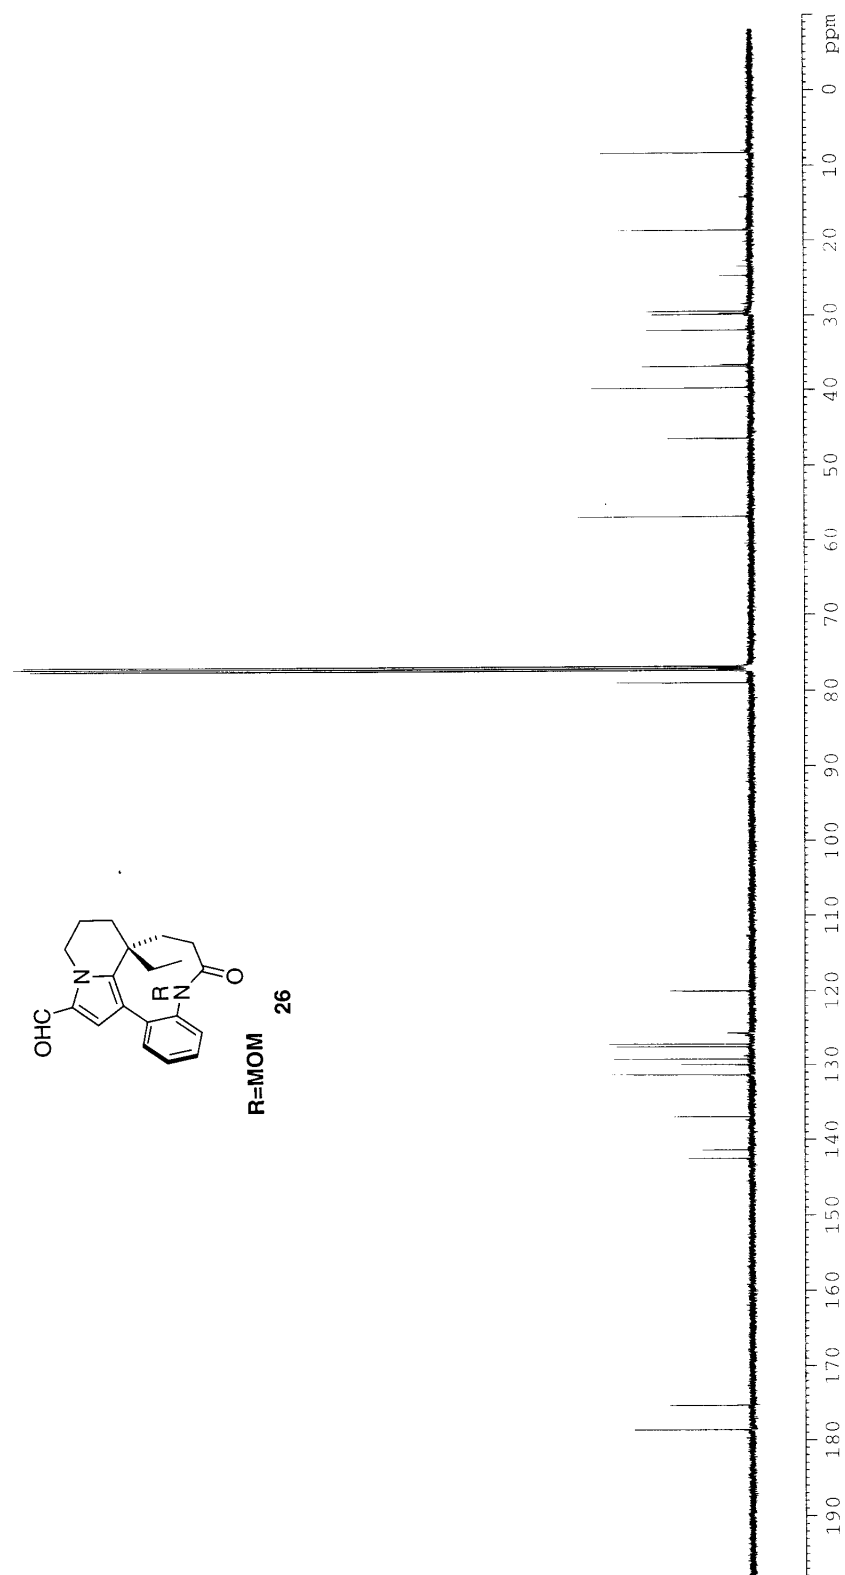

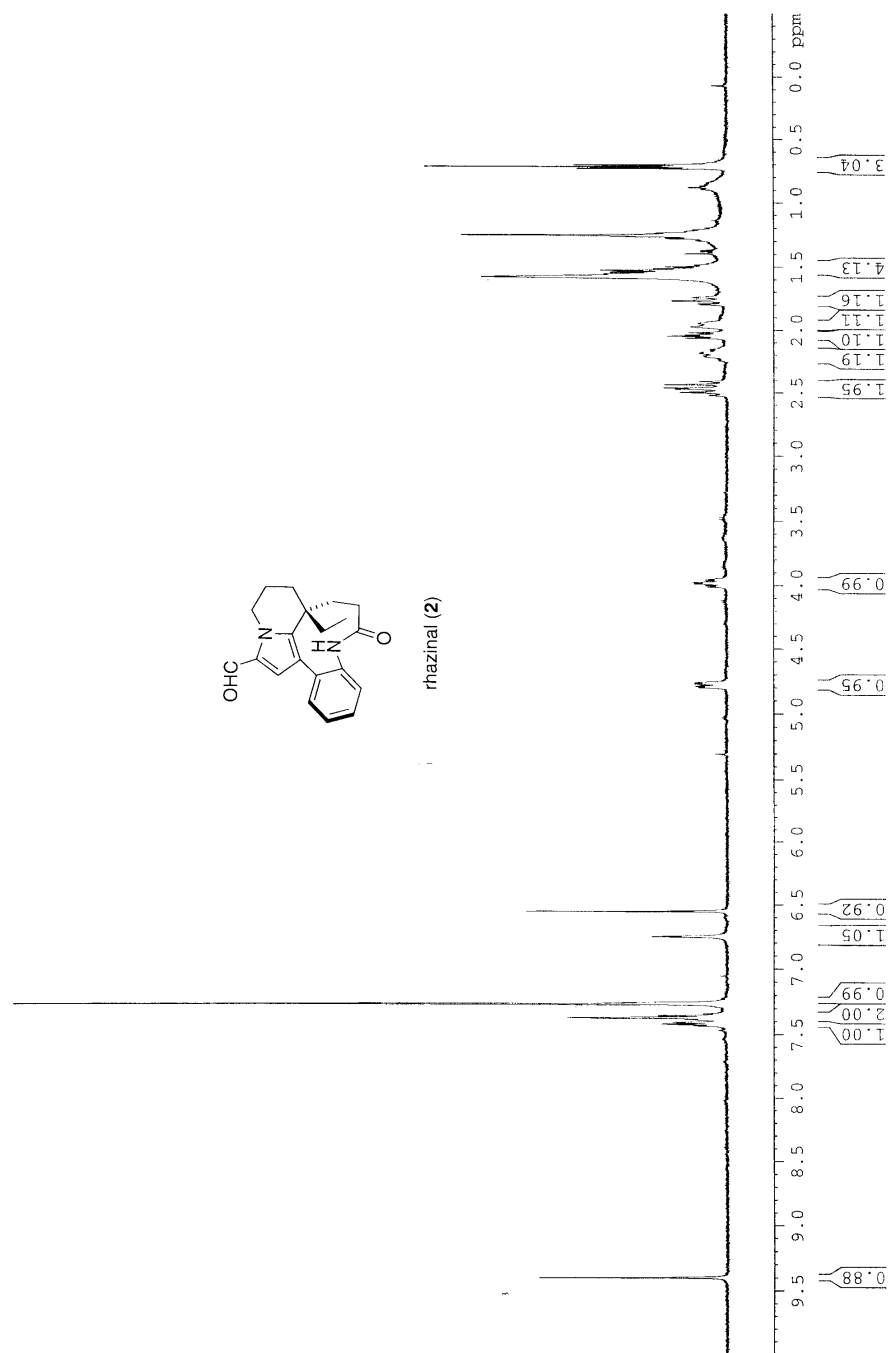

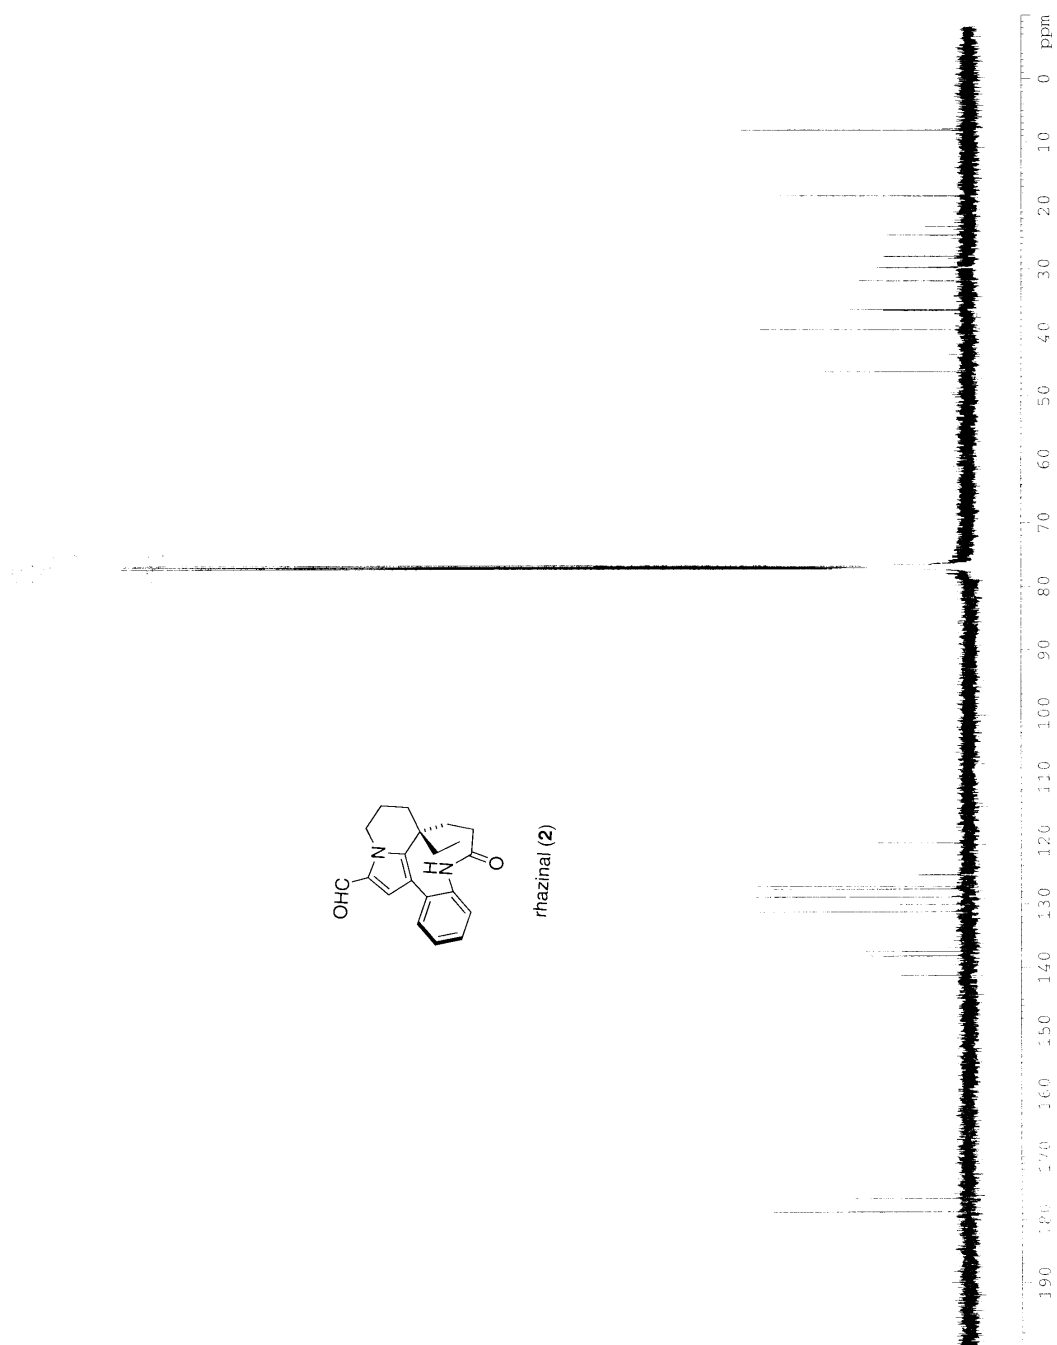

Supplement: Supplementary file 1 [file 4574638]
